# Supplementary material for: Identification of COVID-19 Infection-Related Human Genes Based on a Random Walk Model in a Virus–Human Protein Interaction Network
Source: Biomed Res Int. 2020 Jul 8;2020:4256301. doi: 10.1155/2020/4256301 (PMC7345912; doi:10.1155/2020/4256301)
Supplement: Supplementary Materials — Supplementary File 1: the sequences of COVID-19 proteins. Supplementary File 2: the predicted domains and GO functions of COVID-19 proteins by InterProScan. Supplementary File 3: the GO terms with level ≥ 3 of COVID-19 proteins. Supplementary File 4: the candidate human proteins shared the same GO functions of COVID-19. Supplementary File 5: the mapped COVID-19 candidate human proteins on STRING network. Supplementary File 6: the highly confident human proteins associated with infection of COVID-19. [file 4256301.f1.zip]

Archive with 6 entries (6 files):
- Supp 1.xlsx
- Supp 2.zip
- Supp 3.xlsx
- Supp 4.xlsx
- Supp 5.xlsx
- Supp 6.xlsx
