# Supplementary material for: Identification of COVID-19 Infection-Related Human Genes Based on a Random Walk Model in a Virus–Human Protein Interaction Network
Source: Biomed Res Int. 2020 Jul 8;2020:4256301. doi: 10.1155/2020/4256301 (PMC7345912; doi:10.1155/2020/4256301)
Supplement: Supplementary Materials — Supplementary File 1: the sequences of COVID-19 proteins. Supplementary File 2: the predicted domains and GO functions of COVID-19 proteins by InterProScan. Supplementary File 3: the GO terms with level ≥ 3 of COVID-19 proteins. Supplementary File 4: the candidate human proteins shared the same GO functions of COVID-19. Supplementary File 5: the mapped COVID-19 candidate human proteins on STRING network. Supplementary File 6: the highly confident human proteins associated with infection of COVID-19. [file 4256301.f1.zip › Supp 3.xlsx]

## Sheet: GOterm
GOterm	Name	Ontology	Level	Size
GO:0006351	GO:0006351_transcription, DNA-templated	BP	6+	3668
GO:0006508	GO:0006508_proteolysis	BP	5	1874
GO:0019058	GO:0019058_viral life cycle	BP	6+	328
GO:0019079	GO:0019079_viral genome replication	BP	6+	122
GO:0019082	GO:0019082_viral protein processing	BP	6+	1
GO:0039694	GO:0039694_viral RNA genome replication	BP	6+	32
GO:0046813	GO:0046813_receptor-mediated virion attachment to host cell	BP	6+	5
GO:0061025	GO:0061025_membrane fusion	BP	5	154
GO:0016021	GO:0016021_integral component of membrane	CC	5	5330
GO:0003676	GO:0003676_nucleic acid binding	MF	4	4349
GO:0003723	GO:0003723_RNA binding	MF	5	1950
GO:0003968	GO:0003968_RNA-directed 5'-3' RNA polymerase activity	MF	6+	3
GO:0004197	GO:0004197_cysteine-type endopeptidase activity	MF	6+	116
GO:0005524	GO:0005524_ATP binding	MF	4	1473
GO:0008168	GO:0008168_methyltransferase activity	MF	5	215
GO:0008234	GO:0008234_cysteine-type peptidase activity	MF	6+	184
GO:0008242	GO:0008242_omega peptidase activity	MF	6+	15
GO:0008270	GO:0008270_zinc ion binding	MF	6+	816
GO:0016740	GO:0016740_transferase activity	MF	3	2272
GO:0016896	GO:0016896_exoribonuclease activity, producing 5'-phosphomonoesters	MF	6+	36
