# Supplementary material for: Identification of COVID-19 Infection-Related Human Genes Based on a Random Walk Model in a Virus–Human Protein Interaction Network
Source: Biomed Res Int. 2020 Jul 8;2020:4256301. doi: 10.1155/2020/4256301 (PMC7345912; doi:10.1155/2020/4256301)
Supplement: Supplementary Materials — Supplementary File 1: the sequences of COVID-19 proteins. Supplementary File 2: the predicted domains and GO functions of COVID-19 proteins by InterProScan. Supplementary File 3: the GO terms with level ≥ 3 of COVID-19 proteins. Supplementary File 4: the candidate human proteins shared the same GO functions of COVID-19. Supplementary File 5: the mapped COVID-19 candidate human proteins on STRING network. Supplementary File 6: the highly confident human proteins associated with infection of COVID-19. [file 4256301.f1.zip › Supp 4.xlsx]

## Sheet: GO_term2Gene
GOterm	Gene
GO:0006351_transcription, DNA-templated	ABCA2
GO:0006351_transcription, DNA-templated	ABL1
GO:0006351_transcription, DNA-templated	ACTA2
GO:0006351_transcription, DNA-templated	ACTL6A
GO:0006351_transcription, DNA-templated	ACVR1
GO:0006351_transcription, DNA-templated	ACVR1B
GO:0006351_transcription, DNA-templated	ACVR2A
GO:0006351_transcription, DNA-templated	ACVR2B
GO:0006351_transcription, DNA-templated	ACVRL1
GO:0006351_transcription, DNA-templated	ADAM8
GO:0006351_transcription, DNA-templated	ADCY1
GO:0006351_transcription, DNA-templated	ADCY8
GO:0006351_transcription, DNA-templated	ADCYAP1
GO:0006351_transcription, DNA-templated	ADORA2A
GO:0006351_transcription, DNA-templated	ADORA3
GO:0006351_transcription, DNA-templated	PARP1
GO:0006351_transcription, DNA-templated	ADRB2
GO:0006351_transcription, DNA-templated	AEBP1
GO:0006351_transcription, DNA-templated	TLE5
GO:0006351_transcription, DNA-templated	AGER
GO:0006351_transcription, DNA-templated	JAG1
GO:0006351_transcription, DNA-templated	AGT
GO:0006351_transcription, DNA-templated	AGTR2
GO:0006351_transcription, DNA-templated	NR0B1
GO:0006351_transcription, DNA-templated	AHR
GO:0006351_transcription, DNA-templated	AKT1
GO:0006351_transcription, DNA-templated	ALK
GO:0006351_transcription, DNA-templated	ALX3
GO:0006351_transcription, DNA-templated	AMH
GO:0006351_transcription, DNA-templated	AMHR2
GO:0006351_transcription, DNA-templated	ANG
GO:0006351_transcription, DNA-templated	ANXA3
GO:0006351_transcription, DNA-templated	ANXA4
GO:0006351_transcription, DNA-templated	APBB1
GO:0006351_transcription, DNA-templated	APBB2
GO:0006351_transcription, DNA-templated	AIRE
GO:0006351_transcription, DNA-templated	XIAP
GO:0006351_transcription, DNA-templated	BIRC5
GO:0006351_transcription, DNA-templated	APOBEC1
GO:0006351_transcription, DNA-templated	APOE
GO:0006351_transcription, DNA-templated	APP
GO:0006351_transcription, DNA-templated	FASLG
GO:0006351_transcription, DNA-templated	AR
GO:0006351_transcription, DNA-templated	ARF4
GO:0006351_transcription, DNA-templated	RHOA
GO:0006351_transcription, DNA-templated	RHOG
GO:0006351_transcription, DNA-templated	RHOH
GO:0006351_transcription, DNA-templated	PHOX2A
GO:0006351_transcription, DNA-templated	ARNT
GO:0006351_transcription, DNA-templated	ARNTL
GO:0006351_transcription, DNA-templated	ARRB1
GO:0006351_transcription, DNA-templated	ARRB2
GO:0006351_transcription, DNA-templated	ASCL1
GO:0006351_transcription, DNA-templated	ASCL2
GO:0006351_transcription, DNA-templated	ZFHX3
GO:0006351_transcription, DNA-templated	ATF1
GO:0006351_transcription, DNA-templated	ATF3
GO:0006351_transcription, DNA-templated	ATF4
GO:0006351_transcription, DNA-templated	ATM
GO:0006351_transcription, DNA-templated	RERE
GO:0006351_transcription, DNA-templated	ATOH1
GO:0006351_transcription, DNA-templated	ATP2B4
GO:0006351_transcription, DNA-templated	ATRX
GO:0006351_transcription, DNA-templated	BACH1
GO:0006351_transcription, DNA-templated	NKX3-2
GO:0006351_transcription, DNA-templated	BAX
GO:0006351_transcription, DNA-templated	CCND1
GO:0006351_transcription, DNA-templated	BCL3
GO:0006351_transcription, DNA-templated	BCL6
GO:0006351_transcription, DNA-templated	BCL7A
GO:0006351_transcription, DNA-templated	BCL9
GO:0006351_transcription, DNA-templated	PRDM1
GO:0006351_transcription, DNA-templated	BLM
GO:0006351_transcription, DNA-templated	BNC1
GO:0006351_transcription, DNA-templated	BMI1
GO:0006351_transcription, DNA-templated	BMP2
GO:0006351_transcription, DNA-templated	BMP4
GO:0006351_transcription, DNA-templated	BMP5
GO:0006351_transcription, DNA-templated	BMP6
GO:0006351_transcription, DNA-templated	BMP7
GO:0006351_transcription, DNA-templated	BMP8B
GO:0006351_transcription, DNA-templated	BMPR1A
GO:0006351_transcription, DNA-templated	BMPR1B
GO:0006351_transcription, DNA-templated	BMPR2
GO:0006351_transcription, DNA-templated	POLR3D
GO:0006351_transcription, DNA-templated	FOXL2
GO:0006351_transcription, DNA-templated	BRCA1
GO:0006351_transcription, DNA-templated	BRCA2
GO:0006351_transcription, DNA-templated	BRDT
GO:0006351_transcription, DNA-templated	ZFP36L1
GO:0006351_transcription, DNA-templated	ZFP36L2
GO:0006351_transcription, DNA-templated	KLF9
GO:0006351_transcription, DNA-templated	KLF5
GO:0006351_transcription, DNA-templated	BTF3
GO:0006351_transcription, DNA-templated	BTG1
GO:0006351_transcription, DNA-templated	BTK
GO:0006351_transcription, DNA-templated	C1QBP
GO:0006351_transcription, DNA-templated	C5AR1
GO:0006351_transcription, DNA-templated	MYRF
GO:0006351_transcription, DNA-templated	CA9
GO:0006351_transcription, DNA-templated	CALCA
GO:0006351_transcription, DNA-templated	CALR
GO:0006351_transcription, DNA-templated	CAMK4
GO:0006351_transcription, DNA-templated	CAMK2A
GO:0006351_transcription, DNA-templated	CAMK2D
GO:0006351_transcription, DNA-templated	CAPN3
GO:0006351_transcription, DNA-templated	CAT
GO:0006351_transcription, DNA-templated	CAV1
GO:0006351_transcription, DNA-templated	RUNX2
GO:0006351_transcription, DNA-templated	RUNX1
GO:0006351_transcription, DNA-templated	RUNX1T1
GO:0006351_transcription, DNA-templated	CBFA2T3
GO:0006351_transcription, DNA-templated	RUNX3
GO:0006351_transcription, DNA-templated	CBFB
GO:0006351_transcription, DNA-templated	CCNA2
GO:0006351_transcription, DNA-templated	CCNB1
GO:0006351_transcription, DNA-templated	CCNC
GO:0006351_transcription, DNA-templated	CCND3
GO:0006351_transcription, DNA-templated	CCNE1
GO:0006351_transcription, DNA-templated	CCNH
GO:0006351_transcription, DNA-templated	CCNT1
GO:0006351_transcription, DNA-templated	CCNT2
GO:0006351_transcription, DNA-templated	CD3D
GO:0006351_transcription, DNA-templated	CD4
GO:0006351_transcription, DNA-templated	CD28
GO:0006351_transcription, DNA-templated	CD80
GO:0006351_transcription, DNA-templated	CD86
GO:0006351_transcription, DNA-templated	TNFSF8
GO:0006351_transcription, DNA-templated	CD36
GO:0006351_transcription, DNA-templated	CD38
GO:0006351_transcription, DNA-templated	CD40
GO:0006351_transcription, DNA-templated	CD40LG
GO:0006351_transcription, DNA-templated	CD74
GO:0006351_transcription, DNA-templated	CD81
GO:0006351_transcription, DNA-templated	CDK1
GO:0006351_transcription, DNA-templated	CDK11B
GO:0006351_transcription, DNA-templated	CDC5L
GO:0006351_transcription, DNA-templated	CDC6
GO:0006351_transcription, DNA-templated	CDH1
GO:0006351_transcription, DNA-templated	CDH5
GO:0006351_transcription, DNA-templated	CDH13
GO:0006351_transcription, DNA-templated	CDK2
GO:0006351_transcription, DNA-templated	CDK4
GO:0006351_transcription, DNA-templated	CDK5
GO:0006351_transcription, DNA-templated	CDK6
GO:0006351_transcription, DNA-templated	CDK7
GO:0006351_transcription, DNA-templated	CDK8
GO:0006351_transcription, DNA-templated	CDK9
GO:0006351_transcription, DNA-templated	CDKN1A
GO:0006351_transcription, DNA-templated	CDKN1B
GO:0006351_transcription, DNA-templated	CDKN1C
GO:0006351_transcription, DNA-templated	CDKN2A
GO:0006351_transcription, DNA-templated	CDKN2B
GO:0006351_transcription, DNA-templated	CDX1
GO:0006351_transcription, DNA-templated	CDX2
GO:0006351_transcription, DNA-templated	CDX4
GO:0006351_transcription, DNA-templated	CEBPA
GO:0006351_transcription, DNA-templated	CEBPB
GO:0006351_transcription, DNA-templated	CEBPD
GO:0006351_transcription, DNA-templated	CEBPE
GO:0006351_transcription, DNA-templated	CEBPG
GO:0006351_transcription, DNA-templated	CENPF
GO:0006351_transcription, DNA-templated	CGA
GO:0006351_transcription, DNA-templated	CGB3
GO:0006351_transcription, DNA-templated	CHD1
GO:0006351_transcription, DNA-templated	CHD2
GO:0006351_transcription, DNA-templated	CHD3
GO:0006351_transcription, DNA-templated	CHD4
GO:0006351_transcription, DNA-templated	CHEK1
GO:0006351_transcription, DNA-templated	FOXN3
GO:0006351_transcription, DNA-templated	CHUK
GO:0006351_transcription, DNA-templated	CKS2
GO:0006351_transcription, DNA-templated	CLU
GO:0006351_transcription, DNA-templated	CMKLR1
GO:0006351_transcription, DNA-templated	PLK3
GO:0006351_transcription, DNA-templated	COL1A1
GO:0006351_transcription, DNA-templated	COL4A2
GO:0006351_transcription, DNA-templated	COMP
GO:0006351_transcription, DNA-templated	KLF6
GO:0006351_transcription, DNA-templated	CRABP2
GO:0006351_transcription, DNA-templated	CREB1
GO:0006351_transcription, DNA-templated	ATF2
GO:0006351_transcription, DNA-templated	CREBBP
GO:0006351_transcription, DNA-templated	ATF6B
GO:0006351_transcription, DNA-templated	CREBL2
GO:0006351_transcription, DNA-templated	CREM
GO:0006351_transcription, DNA-templated	CRK
GO:0006351_transcription, DNA-templated	CRX
GO:0006351_transcription, DNA-templated	CRY1
GO:0006351_transcription, DNA-templated	CRY2
GO:0006351_transcription, DNA-templated	CRYAB
GO:0006351_transcription, DNA-templated	CRYM
GO:0006351_transcription, DNA-templated	MAPK14
GO:0006351_transcription, DNA-templated	CSF2
GO:0006351_transcription, DNA-templated	CSF3
GO:0006351_transcription, DNA-templated	CSTF1
GO:0006351_transcription, DNA-templated	CSTF2
GO:0006351_transcription, DNA-templated	CSTF3
GO:0006351_transcription, DNA-templated	NKX2-5
GO:0006351_transcription, DNA-templated	CTAG1B
GO:0006351_transcription, DNA-templated	CTBP1
GO:0006351_transcription, DNA-templated	CTBP2
GO:0006351_transcription, DNA-templated	CCN2
GO:0006351_transcription, DNA-templated	CTH
GO:0006351_transcription, DNA-templated	CTNNB1
GO:0006351_transcription, DNA-templated	CUX1
GO:0006351_transcription, DNA-templated	CX3CR1
GO:0006351_transcription, DNA-templated	CYLD
GO:0006351_transcription, DNA-templated	CYP1B1
GO:0006351_transcription, DNA-templated	DAB2
GO:0006351_transcription, DNA-templated	DACH1
GO:0006351_transcription, DNA-templated	DGKQ
GO:0006351_transcription, DNA-templated	DAP
GO:0006351_transcription, DNA-templated	DAPK3
GO:0006351_transcription, DNA-templated	DAXX
GO:0006351_transcription, DNA-templated	DBP
GO:0006351_transcription, DNA-templated	DCN
GO:0006351_transcription, DNA-templated	DDIT3
GO:0006351_transcription, DNA-templated	DDX3X
GO:0006351_transcription, DNA-templated	DDX5
GO:0006351_transcription, DNA-templated	DHX9
GO:0006351_transcription, DNA-templated	DDX11
GO:0006351_transcription, DNA-templated	DHFR
GO:0006351_transcription, DNA-templated	DLG1
GO:0006351_transcription, DNA-templated	DLX1
GO:0006351_transcription, DNA-templated	DLX2
GO:0006351_transcription, DNA-templated	DLX3
GO:0006351_transcription, DNA-templated	DLX4
GO:0006351_transcription, DNA-templated	DLX5
GO:0006351_transcription, DNA-templated	DLX6
GO:0006351_transcription, DNA-templated	DMRT1
GO:0006351_transcription, DNA-templated	DNM2
GO:0006351_transcription, DNA-templated	DNMT1
GO:0006351_transcription, DNA-templated	DNMT3A
GO:0006351_transcription, DNA-templated	DNMT3B
GO:0006351_transcription, DNA-templated	DR1
GO:0006351_transcription, DNA-templated	SLC26A3
GO:0006351_transcription, DNA-templated	DRD2
GO:0006351_transcription, DNA-templated	DRD3
GO:0006351_transcription, DNA-templated	ARID3A
GO:0006351_transcription, DNA-templated	ATN1
GO:0006351_transcription, DNA-templated	RCAN1
GO:0006351_transcription, DNA-templated	TSC22D3
GO:0006351_transcription, DNA-templated	DTX1
GO:0006351_transcription, DNA-templated	DVL1
GO:0006351_transcription, DNA-templated	DVL2
GO:0006351_transcription, DNA-templated	DVL3
GO:0006351_transcription, DNA-templated	E2F1
GO:0006351_transcription, DNA-templated	E2F2
GO:0006351_transcription, DNA-templated	E2F3
GO:0006351_transcription, DNA-templated	E2F4
GO:0006351_transcription, DNA-templated	E2F5
GO:0006351_transcription, DNA-templated	E2F6
GO:0006351_transcription, DNA-templated	E4F1
GO:0006351_transcription, DNA-templated	EBF1
GO:0006351_transcription, DNA-templated	ECM1
GO:0006351_transcription, DNA-templated	EDA
GO:0006351_transcription, DNA-templated	S1PR1
GO:0006351_transcription, DNA-templated	EDN1
GO:0006351_transcription, DNA-templated	EDNRB
GO:0006351_transcription, DNA-templated	EFNA1
GO:0006351_transcription, DNA-templated	EGF
GO:0006351_transcription, DNA-templated	CELSR2
GO:0006351_transcription, DNA-templated	MEGF8
GO:0006351_transcription, DNA-templated	EGFR
GO:0006351_transcription, DNA-templated	EGR1
GO:0006351_transcription, DNA-templated	EGR2
GO:0006351_transcription, DNA-templated	EGR3
GO:0006351_transcription, DNA-templated	EGR4
GO:0006351_transcription, DNA-templated	CELA1
GO:0006351_transcription, DNA-templated	ELANE
GO:0006351_transcription, DNA-templated	ELAVL2
GO:0006351_transcription, DNA-templated	ELF1
GO:0006351_transcription, DNA-templated	ELF2
GO:0006351_transcription, DNA-templated	ELF3
GO:0006351_transcription, DNA-templated	ELF4
GO:0006351_transcription, DNA-templated	ELF5
GO:0006351_transcription, DNA-templated	ELK1
GO:0006351_transcription, DNA-templated	ELK3
GO:0006351_transcription, DNA-templated	ELK4
GO:0006351_transcription, DNA-templated	EMX1
GO:0006351_transcription, DNA-templated	EMX2
GO:0006351_transcription, DNA-templated	EN1
GO:0006351_transcription, DNA-templated	EN2
GO:0006351_transcription, DNA-templated	ENG
GO:0006351_transcription, DNA-templated	ENO1
GO:0006351_transcription, DNA-templated	EP300
GO:0006351_transcription, DNA-templated	EPAS1
GO:0006351_transcription, DNA-templated	EPHA5
GO:0006351_transcription, DNA-templated	EPO
GO:0006351_transcription, DNA-templated	NR2F6
GO:0006351_transcription, DNA-templated	ERBB2
GO:0006351_transcription, DNA-templated	ERBB4
GO:0006351_transcription, DNA-templated	ERCC2
GO:0006351_transcription, DNA-templated	EREG
GO:0006351_transcription, DNA-templated	ERCC3
GO:0006351_transcription, DNA-templated	ERCC6
GO:0006351_transcription, DNA-templated	ERF
GO:0006351_transcription, DNA-templated	ERG
GO:0006351_transcription, DNA-templated	ESR1
GO:0006351_transcription, DNA-templated	ESR2
GO:0006351_transcription, DNA-templated	ESRRA
GO:0006351_transcription, DNA-templated	ESRRB
GO:0006351_transcription, DNA-templated	ESRRG
GO:0006351_transcription, DNA-templated	ETS1
GO:0006351_transcription, DNA-templated	ETS2
GO:0006351_transcription, DNA-templated	ETV1
GO:0006351_transcription, DNA-templated	ETV2
GO:0006351_transcription, DNA-templated	ETV3
GO:0006351_transcription, DNA-templated	ETV4
GO:0006351_transcription, DNA-templated	ETV5
GO:0006351_transcription, DNA-templated	ETV6
GO:0006351_transcription, DNA-templated	MECOM
GO:0006351_transcription, DNA-templated	EVX1
GO:0006351_transcription, DNA-templated	EWSR1
GO:0006351_transcription, DNA-templated	EYA1
GO:0006351_transcription, DNA-templated	EZH1
GO:0006351_transcription, DNA-templated	EZH2
GO:0006351_transcription, DNA-templated	F2R
GO:0006351_transcription, DNA-templated	F2RL1
GO:0006351_transcription, DNA-templated	FABP4
GO:0006351_transcription, DNA-templated	FANCA
GO:0006351_transcription, DNA-templated	FANCD2
GO:0006351_transcription, DNA-templated	BPTF
GO:0006351_transcription, DNA-templated	FBN1
GO:0006351_transcription, DNA-templated	EFEMP1
GO:0006351_transcription, DNA-templated	FBP1
GO:0006351_transcription, DNA-templated	FER
GO:0006351_transcription, DNA-templated	FGF1
GO:0006351_transcription, DNA-templated	FGF2
GO:0006351_transcription, DNA-templated	FGF4
GO:0006351_transcription, DNA-templated	FGF7
GO:0006351_transcription, DNA-templated	FGF8
GO:0006351_transcription, DNA-templated	FGF9
GO:0006351_transcription, DNA-templated	FGF10
GO:0006351_transcription, DNA-templated	FGFR1
GO:0006351_transcription, DNA-templated	FGFR2
GO:0006351_transcription, DNA-templated	FHL2
GO:0006351_transcription, DNA-templated	FOXG1
GO:0006351_transcription, DNA-templated	FOXF1
GO:0006351_transcription, DNA-templated	FOXF2
GO:0006351_transcription, DNA-templated	FOXC1
GO:0006351_transcription, DNA-templated	FOXD1
GO:0006351_transcription, DNA-templated	FOXD4
GO:0006351_transcription, DNA-templated	FOXI1
GO:0006351_transcription, DNA-templated	FOXL1
GO:0006351_transcription, DNA-templated	FOXE3
GO:0006351_transcription, DNA-templated	FOXJ1
GO:0006351_transcription, DNA-templated	FOXC2
GO:0006351_transcription, DNA-templated	FOXE1
GO:0006351_transcription, DNA-templated	FOXM1
GO:0006351_transcription, DNA-templated	FOXD2
GO:0006351_transcription, DNA-templated	FOXS1
GO:0006351_transcription, DNA-templated	FOXO1
GO:0006351_transcription, DNA-templated	FOXO3
GO:0006351_transcription, DNA-templated	FOXO3B
GO:0006351_transcription, DNA-templated	FLI1
GO:0006351_transcription, DNA-templated	FLNA
GO:0006351_transcription, DNA-templated	FLOT2
GO:0006351_transcription, DNA-templated	FLT3LG
GO:0006351_transcription, DNA-templated	AFF2
GO:0006351_transcription, DNA-templated	FOS
GO:0006351_transcription, DNA-templated	FOSB
GO:0006351_transcription, DNA-templated	FOSL2
GO:0006351_transcription, DNA-templated	FRK
GO:0006351_transcription, DNA-templated	MTOR
GO:0006351_transcription, DNA-templated	FSHB
GO:0006351_transcription, DNA-templated	NR5A2
GO:0006351_transcription, DNA-templated	NR5A1
GO:0006351_transcription, DNA-templated	FUS
GO:0006351_transcription, DNA-templated	FZD2
GO:0006351_transcription, DNA-templated	XRCC6
GO:0006351_transcription, DNA-templated	GABPA
GO:0006351_transcription, DNA-templated	GABPB1
GO:0006351_transcription, DNA-templated	GALR1
GO:0006351_transcription, DNA-templated	GAS6
GO:0006351_transcription, DNA-templated	GATA1
GO:0006351_transcription, DNA-templated	GATA2
GO:0006351_transcription, DNA-templated	GATA3
GO:0006351_transcription, DNA-templated	GATA4
GO:0006351_transcription, DNA-templated	GATA6
GO:0006351_transcription, DNA-templated	GBX1
GO:0006351_transcription, DNA-templated	GBX2
GO:0006351_transcription, DNA-templated	GCG
GO:0006351_transcription, DNA-templated	KAT2A
GO:0006351_transcription, DNA-templated	NR6A1
GO:0006351_transcription, DNA-templated	GDF1
GO:0006351_transcription, DNA-templated	GDF2
GO:0006351_transcription, DNA-templated	MSTN
GO:0006351_transcription, DNA-templated	GDF9
GO:0006351_transcription, DNA-templated	GDNF
GO:0006351_transcription, DNA-templated	GFI1
GO:0006351_transcription, DNA-templated	GPC3
GO:0006351_transcription, DNA-templated	GCLC
GO:0006351_transcription, DNA-templated	GLI1
GO:0006351_transcription, DNA-templated	GLI2
GO:0006351_transcription, DNA-templated	GLI3
GO:0006351_transcription, DNA-templated	GLI4
GO:0006351_transcription, DNA-templated	GOLGB1
GO:0006351_transcription, DNA-templated	GPER1
GO:0006351_transcription, DNA-templated	GPS2
GO:0006351_transcription, DNA-templated	GRIN1
GO:0006351_transcription, DNA-templated	NR3C1
GO:0006351_transcription, DNA-templated	ARHGAP35
GO:0006351_transcription, DNA-templated	GSC2
GO:0006351_transcription, DNA-templated	GTF2A1
GO:0006351_transcription, DNA-templated	GTF2A2
GO:0006351_transcription, DNA-templated	GTF2B
GO:0006351_transcription, DNA-templated	GTF2E1
GO:0006351_transcription, DNA-templated	GTF2E2
GO:0006351_transcription, DNA-templated	GTF2F1
GO:0006351_transcription, DNA-templated	GTF2F2
GO:0006351_transcription, DNA-templated	GTF2H1
GO:0006351_transcription, DNA-templated	GTF2H2
GO:0006351_transcription, DNA-templated	GTF2H3
GO:0006351_transcription, DNA-templated	GTF2H4
GO:0006351_transcription, DNA-templated	GTF2I
GO:0006351_transcription, DNA-templated	GTF3A
GO:0006351_transcription, DNA-templated	BRF1
GO:0006351_transcription, DNA-templated	GTF3C1
GO:0006351_transcription, DNA-templated	GTF3C2
GO:0006351_transcription, DNA-templated	H1-0
GO:0006351_transcription, DNA-templated	H1-2
GO:0006351_transcription, DNA-templated	H1-3
GO:0006351_transcription, DNA-templated	H1-4
GO:0006351_transcription, DNA-templated	H1-5
GO:0006351_transcription, DNA-templated	H1-6
GO:0006351_transcription, DNA-templated	H2AZ1
GO:0006351_transcription, DNA-templated	H3-3A
GO:0006351_transcription, DNA-templated	H3-3B
GO:0006351_transcription, DNA-templated	H1-1
GO:0006351_transcription, DNA-templated	HAS3
GO:0006351_transcription, DNA-templated	HBZ
GO:0006351_transcription, DNA-templated	HCFC1
GO:0006351_transcription, DNA-templated	HCK
GO:0006351_transcription, DNA-templated	HCLS1
GO:0006351_transcription, DNA-templated	HDAC1
GO:0006351_transcription, DNA-templated	HDAC2
GO:0006351_transcription, DNA-templated	HDGF
GO:0006351_transcription, DNA-templated	HELLS
GO:0006351_transcription, DNA-templated	HEXB
GO:0006351_transcription, DNA-templated	HFE
GO:0006351_transcription, DNA-templated	HGF
GO:0006351_transcription, DNA-templated	NRG1
GO:0006351_transcription, DNA-templated	HHEX
GO:0006351_transcription, DNA-templated	HIC1
GO:0006351_transcription, DNA-templated	HIF1A
GO:0006351_transcription, DNA-templated	HINT1
GO:0006351_transcription, DNA-templated	HIVEP1
GO:0006351_transcription, DNA-templated	HIVEP2
GO:0006351_transcription, DNA-templated	ZBTB48
GO:0006351_transcription, DNA-templated	MNX1
GO:0006351_transcription, DNA-templated	HLF
GO:0006351_transcription, DNA-templated	HLX
GO:0006351_transcription, DNA-templated	HMGB1
GO:0006351_transcription, DNA-templated	HMGB2
GO:0006351_transcription, DNA-templated	HMGB3
GO:0006351_transcription, DNA-templated	HMGN1
GO:0006351_transcription, DNA-templated	HMGA1
GO:0006351_transcription, DNA-templated	HMOX1
GO:0006351_transcription, DNA-templated	NR4A1
GO:0006351_transcription, DNA-templated	HMX1
GO:0006351_transcription, DNA-templated	HMX2
GO:0006351_transcription, DNA-templated	FOXA1
GO:0006351_transcription, DNA-templated	FOXA2
GO:0006351_transcription, DNA-templated	FOXA3
GO:0006351_transcription, DNA-templated	HNF4A
GO:0006351_transcription, DNA-templated	HNF4G
GO:0006351_transcription, DNA-templated	ONECUT1
GO:0006351_transcription, DNA-templated	HNRNPA2B1
GO:0006351_transcription, DNA-templated	HNRNPAB
GO:0006351_transcription, DNA-templated	HNRNPD
GO:0006351_transcription, DNA-templated	HNRNPK
GO:0006351_transcription, DNA-templated	HNRNPU
GO:0006351_transcription, DNA-templated	TLX1
GO:0006351_transcription, DNA-templated	TLX2
GO:0006351_transcription, DNA-templated	HOXA1
GO:0006351_transcription, DNA-templated	HOXA2
GO:0006351_transcription, DNA-templated	HOXA3
GO:0006351_transcription, DNA-templated	HOXA4
GO:0006351_transcription, DNA-templated	HOXA5
GO:0006351_transcription, DNA-templated	HOXA6
GO:0006351_transcription, DNA-templated	HOXA7
GO:0006351_transcription, DNA-templated	HOXA9
GO:0006351_transcription, DNA-templated	HOXA10
GO:0006351_transcription, DNA-templated	HOXA11
GO:0006351_transcription, DNA-templated	HOXA13
GO:0006351_transcription, DNA-templated	HOXB1
GO:0006351_transcription, DNA-templated	HOXB2
GO:0006351_transcription, DNA-templated	HOXB3
GO:0006351_transcription, DNA-templated	HOXB4
GO:0006351_transcription, DNA-templated	HOXB5
GO:0006351_transcription, DNA-templated	HOXB6
GO:0006351_transcription, DNA-templated	HOXB7
GO:0006351_transcription, DNA-templated	HOXB8
GO:0006351_transcription, DNA-templated	HOXB9
GO:0006351_transcription, DNA-templated	HOXC4
GO:0006351_transcription, DNA-templated	HOXC5
GO:0006351_transcription, DNA-templated	HOXC6
GO:0006351_transcription, DNA-templated	HOXC8
GO:0006351_transcription, DNA-templated	HOXC9
GO:0006351_transcription, DNA-templated	HOXC10
GO:0006351_transcription, DNA-templated	HOXC11
GO:0006351_transcription, DNA-templated	HOXC12
GO:0006351_transcription, DNA-templated	HOXC13
GO:0006351_transcription, DNA-templated	HOXD1
GO:0006351_transcription, DNA-templated	HOXD3
GO:0006351_transcription, DNA-templated	HOXD4
GO:0006351_transcription, DNA-templated	HOXD8
GO:0006351_transcription, DNA-templated	HOXD9
GO:0006351_transcription, DNA-templated	HOXD10
GO:0006351_transcription, DNA-templated	HOXD11
GO:0006351_transcription, DNA-templated	HOXD12
GO:0006351_transcription, DNA-templated	HOXD13
GO:0006351_transcription, DNA-templated	HRAS
GO:0006351_transcription, DNA-templated	PRMT2
GO:0006351_transcription, DNA-templated	PRMT1
GO:0006351_transcription, DNA-templated	HES1
GO:0006351_transcription, DNA-templated	HSBP1
GO:0006351_transcription, DNA-templated	HSF1
GO:0006351_transcription, DNA-templated	HSF2
GO:0006351_transcription, DNA-templated	HSF4
GO:0006351_transcription, DNA-templated	HSPA1A
GO:0006351_transcription, DNA-templated	HSPA1B
GO:0006351_transcription, DNA-templated	HSPA5
GO:0006351_transcription, DNA-templated	HSPA8
GO:0006351_transcription, DNA-templated	HSPD1
GO:0006351_transcription, DNA-templated	DNAJB1
GO:0006351_transcription, DNA-templated	FOXN2
GO:0006351_transcription, DNA-templated	ICAM1
GO:0006351_transcription, DNA-templated	IRF8
GO:0006351_transcription, DNA-templated	ID1
GO:0006351_transcription, DNA-templated	ID2
GO:0006351_transcription, DNA-templated	ID3
GO:0006351_transcription, DNA-templated	ID4
GO:0006351_transcription, DNA-templated	IFI16
GO:0006351_transcription, DNA-templated	IFI27
GO:0006351_transcription, DNA-templated	SP110
GO:0006351_transcription, DNA-templated	IFNA2
GO:0006351_transcription, DNA-templated	IFNB1
GO:0006351_transcription, DNA-templated	IFNG
GO:0006351_transcription, DNA-templated	IGBP1
GO:0006351_transcription, DNA-templated	IGF1
GO:0006351_transcription, DNA-templated	IGF2
GO:0006351_transcription, DNA-templated	CCN1
GO:0006351_transcription, DNA-templated	IGHMBP2
GO:0006351_transcription, DNA-templated	RBPJ
GO:0006351_transcription, DNA-templated	IGSF1
GO:0006351_transcription, DNA-templated	IHH
GO:0006351_transcription, DNA-templated	IKBKB
GO:0006351_transcription, DNA-templated	IL1A
GO:0006351_transcription, DNA-templated	IL1B
GO:0006351_transcription, DNA-templated	IL1RAP
GO:0006351_transcription, DNA-templated	IL2
GO:0006351_transcription, DNA-templated	IL4
GO:0006351_transcription, DNA-templated	IL5
GO:0006351_transcription, DNA-templated	IL6
GO:0006351_transcription, DNA-templated	IL10
GO:0006351_transcription, DNA-templated	IL11
GO:0006351_transcription, DNA-templated	IL17A
GO:0006351_transcription, DNA-templated	IL18
GO:0006351_transcription, DNA-templated	FOXK2
GO:0006351_transcription, DNA-templated	ILF2
GO:0006351_transcription, DNA-templated	ILF3
GO:0006351_transcription, DNA-templated	ILK
GO:0006351_transcription, DNA-templated	ING1
GO:0006351_transcription, DNA-templated	ING2
GO:0006351_transcription, DNA-templated	INHBA
GO:0006351_transcription, DNA-templated	CXCL10
GO:0006351_transcription, DNA-templated	INS
GO:0006351_transcription, DNA-templated	INSIG1
GO:0006351_transcription, DNA-templated	INSM1
GO:0006351_transcription, DNA-templated	INSR
GO:0006351_transcription, DNA-templated	PDX1
GO:0006351_transcription, DNA-templated	IRAK1
GO:0006351_transcription, DNA-templated	ITGA6
GO:0006351_transcription, DNA-templated	IRAK2
GO:0006351_transcription, DNA-templated	IRF1
GO:0006351_transcription, DNA-templated	IRF2
GO:0006351_transcription, DNA-templated	IRF3
GO:0006351_transcription, DNA-templated	IRF4
GO:0006351_transcription, DNA-templated	IRF5
GO:0006351_transcription, DNA-templated	IRF6
GO:0006351_transcription, DNA-templated	IRF7
GO:0006351_transcription, DNA-templated	ISL1
GO:0006351_transcription, DNA-templated	ITGA3
GO:0006351_transcription, DNA-templated	ITGB2
GO:0006351_transcription, DNA-templated	JAK2
GO:0006351_transcription, DNA-templated	JARID2
GO:0006351_transcription, DNA-templated	JUN
GO:0006351_transcription, DNA-templated	JUNB
GO:0006351_transcription, DNA-templated	JUND
GO:0006351_transcription, DNA-templated	JUP
GO:0006351_transcription, DNA-templated	KARS1
GO:0006351_transcription, DNA-templated	KIT
GO:0006351_transcription, DNA-templated	KRAS
GO:0006351_transcription, DNA-templated	AFF3
GO:0006351_transcription, DNA-templated	LEP
GO:0006351_transcription, DNA-templated	LGALS9
GO:0006351_transcription, DNA-templated	LHX1
GO:0006351_transcription, DNA-templated	LIF
GO:0006351_transcription, DNA-templated	LIMS1
GO:0006351_transcription, DNA-templated	FADS1
GO:0006351_transcription, DNA-templated	LMO1
GO:0006351_transcription, DNA-templated	LMO2
GO:0006351_transcription, DNA-templated	LMO7
GO:0006351_transcription, DNA-templated	LMX1A
GO:0006351_transcription, DNA-templated	LMX1B
GO:0006351_transcription, DNA-templated	LOXL2
GO:0006351_transcription, DNA-templated	LRP2
GO:0006351_transcription, DNA-templated	LRP6
GO:0006351_transcription, DNA-templated	LRP5
GO:0006351_transcription, DNA-templated	LTF
GO:0006351_transcription, DNA-templated	LUM
GO:0006351_transcription, DNA-templated	LYL1
GO:0006351_transcription, DNA-templated	EPCAM
GO:0006351_transcription, DNA-templated	MXD1
GO:0006351_transcription, DNA-templated	SMAD1
GO:0006351_transcription, DNA-templated	SMAD2
GO:0006351_transcription, DNA-templated	SMAD3
GO:0006351_transcription, DNA-templated	SMAD4
GO:0006351_transcription, DNA-templated	SMAD5
GO:0006351_transcription, DNA-templated	SMAD6
GO:0006351_transcription, DNA-templated	SMAD7
GO:0006351_transcription, DNA-templated	SMAD9
GO:0006351_transcription, DNA-templated	MAF
GO:0006351_transcription, DNA-templated	MAFG
GO:0006351_transcription, DNA-templated	MAGEA1
GO:0006351_transcription, DNA-templated	MAGEA2
GO:0006351_transcription, DNA-templated	MARS1
GO:0006351_transcription, DNA-templated	MAX
GO:0006351_transcription, DNA-templated	MAZ
GO:0006351_transcription, DNA-templated	MBD1
GO:0006351_transcription, DNA-templated	MC1R
GO:0006351_transcription, DNA-templated	MDFI
GO:0006351_transcription, DNA-templated	MDK
GO:0006351_transcription, DNA-templated	MDM2
GO:0006351_transcription, DNA-templated	MDM4
GO:0006351_transcription, DNA-templated	MECP2
GO:0006351_transcription, DNA-templated	MEF2A
GO:0006351_transcription, DNA-templated	BORCS8-MEF2B
GO:0006351_transcription, DNA-templated	MEF2C
GO:0006351_transcription, DNA-templated	MEF2D
GO:0006351_transcription, DNA-templated	MEIS1
GO:0006351_transcription, DNA-templated	MEIS2
GO:0006351_transcription, DNA-templated	MEIS3P1
GO:0006351_transcription, DNA-templated	MAP3K5
GO:0006351_transcription, DNA-templated	MEN1
GO:0006351_transcription, DNA-templated	MEOX1
GO:0006351_transcription, DNA-templated	MEOX2
GO:0006351_transcription, DNA-templated	MET
GO:0006351_transcription, DNA-templated	CIITA
GO:0006351_transcription, DNA-templated	MITF
GO:0006351_transcription, DNA-templated	MLF1
GO:0006351_transcription, DNA-templated	MAP3K10
GO:0006351_transcription, DNA-templated	KMT2A
GO:0006351_transcription, DNA-templated	MLLT1
GO:0006351_transcription, DNA-templated	AFF1
GO:0006351_transcription, DNA-templated	MLLT3
GO:0006351_transcription, DNA-templated	MLLT6
GO:0006351_transcription, DNA-templated	FOXO4
GO:0006351_transcription, DNA-templated	NR3C2
GO:0006351_transcription, DNA-templated	MMP12
GO:0006351_transcription, DNA-templated	MN1
GO:0006351_transcription, DNA-templated	MNAT1
GO:0006351_transcription, DNA-templated	MNT
GO:0006351_transcription, DNA-templated	CD200
GO:0006351_transcription, DNA-templated	CITED1
GO:0006351_transcription, DNA-templated	MSX1
GO:0006351_transcription, DNA-templated	MSX2
GO:0006351_transcription, DNA-templated	MT3
GO:0006351_transcription, DNA-templated	MTF1
GO:0006351_transcription, DNA-templated	MUC1
GO:0006351_transcription, DNA-templated	TRIM37
GO:0006351_transcription, DNA-templated	MXI1
GO:0006351_transcription, DNA-templated	MYB
GO:0006351_transcription, DNA-templated	MYBL1
GO:0006351_transcription, DNA-templated	MYBL2
GO:0006351_transcription, DNA-templated	MYC
GO:0006351_transcription, DNA-templated	MYCL
GO:0006351_transcription, DNA-templated	MYCN
GO:0006351_transcription, DNA-templated	MYD88
GO:0006351_transcription, DNA-templated	MYF5
GO:0006351_transcription, DNA-templated	MYF6
GO:0006351_transcription, DNA-templated	MYH6
GO:0006351_transcription, DNA-templated	MYO6
GO:0006351_transcription, DNA-templated	MYOD1
GO:0006351_transcription, DNA-templated	MYOG
GO:0006351_transcription, DNA-templated	PPP1R12A
GO:0006351_transcription, DNA-templated	MYT1
GO:0006351_transcription, DNA-templated	NAB1
GO:0006351_transcription, DNA-templated	NAB2
GO:0006351_transcription, DNA-templated	NBL1
GO:0006351_transcription, DNA-templated	NCBP1
GO:0006351_transcription, DNA-templated	NCK1
GO:0006351_transcription, DNA-templated	NCL
GO:0006351_transcription, DNA-templated	NDN
GO:0006351_transcription, DNA-templated	NDP
GO:0006351_transcription, DNA-templated	DRG1
GO:0006351_transcription, DNA-templated	NEDD4
GO:0006351_transcription, DNA-templated	NEDD8
GO:0006351_transcription, DNA-templated	NEO1
GO:0006351_transcription, DNA-templated	NEUROD1
GO:0006351_transcription, DNA-templated	NEUROD2
GO:0006351_transcription, DNA-templated	NEUROG1
GO:0006351_transcription, DNA-templated	NFATC1
GO:0006351_transcription, DNA-templated	NFATC2
GO:0006351_transcription, DNA-templated	NFIA
GO:0006351_transcription, DNA-templated	NFATC3
GO:0006351_transcription, DNA-templated	NFATC4
GO:0006351_transcription, DNA-templated	NFE2
GO:0006351_transcription, DNA-templated	NFE2L1
GO:0006351_transcription, DNA-templated	NFE2L2
GO:0006351_transcription, DNA-templated	NFIB
GO:0006351_transcription, DNA-templated	NFIC
GO:0006351_transcription, DNA-templated	NFIL3
GO:0006351_transcription, DNA-templated	NFIX
GO:0006351_transcription, DNA-templated	NFKB1
GO:0006351_transcription, DNA-templated	NFKB2
GO:0006351_transcription, DNA-templated	NFKBIA
GO:0006351_transcription, DNA-templated	NFKBIB
GO:0006351_transcription, DNA-templated	NFKBIE
GO:0006351_transcription, DNA-templated	NFKBIL1
GO:0006351_transcription, DNA-templated	TONSL
GO:0006351_transcription, DNA-templated	NFRKB
GO:0006351_transcription, DNA-templated	NFX1
GO:0006351_transcription, DNA-templated	NFYA
GO:0006351_transcription, DNA-templated	NFYB
GO:0006351_transcription, DNA-templated	NFYC
GO:0006351_transcription, DNA-templated	NGFR
GO:0006351_transcription, DNA-templated	NHLH1
GO:0006351_transcription, DNA-templated	NHLH2
GO:0006351_transcription, DNA-templated	NKX2-2
GO:0006351_transcription, DNA-templated	NKX3-1
GO:0006351_transcription, DNA-templated	NKX6-1
GO:0006351_transcription, DNA-templated	NME2
GO:0006351_transcription, DNA-templated	NODAL
GO:0006351_transcription, DNA-templated	NOP2
GO:0006351_transcription, DNA-templated	NONO
GO:0006351_transcription, DNA-templated	NOS1
GO:0006351_transcription, DNA-templated	CNOT2
GO:0006351_transcription, DNA-templated	CNOT3
GO:0006351_transcription, DNA-templated	NOTCH1
GO:0006351_transcription, DNA-templated	NOTCH2
GO:0006351_transcription, DNA-templated	NOTCH3
GO:0006351_transcription, DNA-templated	NOTCH4
GO:0006351_transcription, DNA-templated	NPAS1
GO:0006351_transcription, DNA-templated	NPAS2
GO:0006351_transcription, DNA-templated	NPAT
GO:0006351_transcription, DNA-templated	NPM1
GO:0006351_transcription, DNA-templated	NPPA
GO:0006351_transcription, DNA-templated	NRF1
GO:0006351_transcription, DNA-templated	NRL
GO:0006351_transcription, DNA-templated	YBX1
GO:0006351_transcription, DNA-templated	NTRK1
GO:0006351_transcription, DNA-templated	ROR1
GO:0006351_transcription, DNA-templated	ROR2
GO:0006351_transcription, DNA-templated	DDR2
GO:0006351_transcription, DNA-templated	NUMA1
GO:0006351_transcription, DNA-templated	NR4A2
GO:0006351_transcription, DNA-templated	OGG1
GO:0006351_transcription, DNA-templated	OPRD1
GO:0006351_transcription, DNA-templated	SIX6
GO:0006351_transcription, DNA-templated	ORC1
GO:0006351_transcription, DNA-templated	ORC2
GO:0006351_transcription, DNA-templated	OSM
GO:0006351_transcription, DNA-templated	OTX1
GO:0006351_transcription, DNA-templated	OTX2
GO:0006351_transcription, DNA-templated	OVOL1
GO:0006351_transcription, DNA-templated	P2RY1
GO:0006351_transcription, DNA-templated	PA2G4
GO:0006351_transcription, DNA-templated	PCSK6
GO:0006351_transcription, DNA-templated	SERPINE1
GO:0006351_transcription, DNA-templated	PAM
GO:0006351_transcription, DNA-templated	PRKN
GO:0006351_transcription, DNA-templated	PAWR
GO:0006351_transcription, DNA-templated	PAX1
GO:0006351_transcription, DNA-templated	PAX2
GO:0006351_transcription, DNA-templated	PAX3
GO:0006351_transcription, DNA-templated	PAX4
GO:0006351_transcription, DNA-templated	PAX5
GO:0006351_transcription, DNA-templated	PAX6
GO:0006351_transcription, DNA-templated	PAX7
GO:0006351_transcription, DNA-templated	PAX9
GO:0006351_transcription, DNA-templated	PBX1
GO:0006351_transcription, DNA-templated	PBX2
GO:0006351_transcription, DNA-templated	PBX3
GO:0006351_transcription, DNA-templated	PCBD1
GO:0006351_transcription, DNA-templated	PCBP1
GO:0006351_transcription, DNA-templated	PCK1
GO:0006351_transcription, DNA-templated	PCNA
GO:0006351_transcription, DNA-templated	CHMP1A
GO:0006351_transcription, DNA-templated	PDE2A
GO:0006351_transcription, DNA-templated	PDE8A
GO:0006351_transcription, DNA-templated	PDGFB
GO:0006351_transcription, DNA-templated	ENPP1
GO:0006351_transcription, DNA-templated	PEG3
GO:0006351_transcription, DNA-templated	PER1
GO:0006351_transcription, DNA-templated	PEX14
GO:0006351_transcription, DNA-templated	PF4
GO:0006351_transcription, DNA-templated	PFDN1
GO:0006351_transcription, DNA-templated	PFDN5
GO:0006351_transcription, DNA-templated	ATP8B1
GO:0006351_transcription, DNA-templated	PFKM
GO:0006351_transcription, DNA-templated	PFN1
GO:0006351_transcription, DNA-templated	PGR
GO:0006351_transcription, DNA-templated	PHB
GO:0006351_transcription, DNA-templated	PHF1
GO:0006351_transcription, DNA-templated	PHF2
GO:0006351_transcription, DNA-templated	PIM1
GO:0006351_transcription, DNA-templated	PIK3R1
GO:0006351_transcription, DNA-templated	PIK3R2
GO:0006351_transcription, DNA-templated	PIN1
GO:0006351_transcription, DNA-templated	PITX1
GO:0006351_transcription, DNA-templated	PITX2
GO:0006351_transcription, DNA-templated	PITX3
GO:0006351_transcription, DNA-templated	PKD1
GO:0006351_transcription, DNA-templated	PKD2
GO:0006351_transcription, DNA-templated	PKHD1
GO:0006351_transcription, DNA-templated	PKNOX1
GO:0006351_transcription, DNA-templated	PLA2G1B
GO:0006351_transcription, DNA-templated	PLAG1
GO:0006351_transcription, DNA-templated	PLAGL1
GO:0006351_transcription, DNA-templated	PLAGL2
GO:0006351_transcription, DNA-templated	SERPINF2
GO:0006351_transcription, DNA-templated	PLK1
GO:0006351_transcription, DNA-templated	PLSCR1
GO:0006351_transcription, DNA-templated	PML
GO:0006351_transcription, DNA-templated	PMS2P3
GO:0006351_transcription, DNA-templated	EXOSC9
GO:0006351_transcription, DNA-templated	PRRX1
GO:0006351_transcription, DNA-templated	POLA1
GO:0006351_transcription, DNA-templated	POLR2A
GO:0006351_transcription, DNA-templated	POLR2B
GO:0006351_transcription, DNA-templated	POLR2C
GO:0006351_transcription, DNA-templated	POLR2D
GO:0006351_transcription, DNA-templated	POLR2E
GO:0006351_transcription, DNA-templated	POLR2F
GO:0006351_transcription, DNA-templated	POLR2G
GO:0006351_transcription, DNA-templated	POLR2H
GO:0006351_transcription, DNA-templated	POLR2I
GO:0006351_transcription, DNA-templated	POLR2J
GO:0006351_transcription, DNA-templated	POLR2K
GO:0006351_transcription, DNA-templated	POLR2L
GO:0006351_transcription, DNA-templated	POLRMT
GO:0006351_transcription, DNA-templated	POMC
GO:0006351_transcription, DNA-templated	POU1F1
GO:0006351_transcription, DNA-templated	POU2AF1
GO:0006351_transcription, DNA-templated	POU2F1
GO:0006351_transcription, DNA-templated	POU2F2
GO:0006351_transcription, DNA-templated	POU3F1
GO:0006351_transcription, DNA-templated	POU3F2
GO:0006351_transcription, DNA-templated	POU3F3
GO:0006351_transcription, DNA-templated	POU3F4
GO:0006351_transcription, DNA-templated	POU4F1
GO:0006351_transcription, DNA-templated	POU4F2
GO:0006351_transcription, DNA-templated	POU4F3
GO:0006351_transcription, DNA-templated	POU5F1
GO:0006351_transcription, DNA-templated	POU5F1B
GO:0006351_transcription, DNA-templated	POU6F1
GO:0006351_transcription, DNA-templated	PPARA
GO:0006351_transcription, DNA-templated	PPARD
GO:0006351_transcription, DNA-templated	PPARG
GO:0006351_transcription, DNA-templated	MED1
GO:0006351_transcription, DNA-templated	PPID
GO:0006351_transcription, DNA-templated	PPM1A
GO:0006351_transcription, DNA-templated	PPP2CA
GO:0006351_transcription, DNA-templated	PPP2R1A
GO:0006351_transcription, DNA-templated	PPP2R5B
GO:0006351_transcription, DNA-templated	PPP3CA
GO:0006351_transcription, DNA-templated	PPP3CB
GO:0006351_transcription, DNA-templated	PPP3R1
GO:0006351_transcription, DNA-templated	PPP5C
GO:0006351_transcription, DNA-templated	PRKAA1
GO:0006351_transcription, DNA-templated	PKIA
GO:0006351_transcription, DNA-templated	PRKAR1A
GO:0006351_transcription, DNA-templated	PRKCB
GO:0006351_transcription, DNA-templated	PRKCH
GO:0006351_transcription, DNA-templated	PRKCI
GO:0006351_transcription, DNA-templated	PKN1
GO:0006351_transcription, DNA-templated	PRKD1
GO:0006351_transcription, DNA-templated	PRKCQ
GO:0006351_transcription, DNA-templated	PRKCZ
GO:0006351_transcription, DNA-templated	PRKDC
GO:0006351_transcription, DNA-templated	MAPK1
GO:0006351_transcription, DNA-templated	MAPK3
GO:0006351_transcription, DNA-templated	MAPK7
GO:0006351_transcription, DNA-templated	MAPK8
GO:0006351_transcription, DNA-templated	MAPK11
GO:0006351_transcription, DNA-templated	MAPK9
GO:0006351_transcription, DNA-templated	MAPK10
GO:0006351_transcription, DNA-templated	MAP2K1
GO:0006351_transcription, DNA-templated	MAP2K2
GO:0006351_transcription, DNA-templated	MAP2K3
GO:0006351_transcription, DNA-templated	MAP2K5
GO:0006351_transcription, DNA-templated	MAP2K7
GO:0006351_transcription, DNA-templated	EIF2AK2
GO:0006351_transcription, DNA-templated	THAP12
GO:0006351_transcription, DNA-templated	PRL
GO:0006351_transcription, DNA-templated	PRNP
GO:0006351_transcription, DNA-templated	PROP1
GO:0006351_transcription, DNA-templated	PROX1
GO:0006351_transcription, DNA-templated	RELN
GO:0006351_transcription, DNA-templated	HTRA1
GO:0006351_transcription, DNA-templated	PSEN1
GO:0006351_transcription, DNA-templated	PSMA1
GO:0006351_transcription, DNA-templated	PSMA2
GO:0006351_transcription, DNA-templated	PSMA3
GO:0006351_transcription, DNA-templated	PSMA4
GO:0006351_transcription, DNA-templated	PSMA5
GO:0006351_transcription, DNA-templated	PSMA6
GO:0006351_transcription, DNA-templated	PSMA7
GO:0006351_transcription, DNA-templated	PSMB1
GO:0006351_transcription, DNA-templated	PSMB2
GO:0006351_transcription, DNA-templated	PSMB3
GO:0006351_transcription, DNA-templated	PSMB4
GO:0006351_transcription, DNA-templated	PSMB5
GO:0006351_transcription, DNA-templated	PSMB6
GO:0006351_transcription, DNA-templated	PSMB7
GO:0006351_transcription, DNA-templated	PSMB8
GO:0006351_transcription, DNA-templated	PSMB9
GO:0006351_transcription, DNA-templated	PSMB10
GO:0006351_transcription, DNA-templated	PSMC1
GO:0006351_transcription, DNA-templated	PSMC2
GO:0006351_transcription, DNA-templated	PSMC3
GO:0006351_transcription, DNA-templated	PSMC4
GO:0006351_transcription, DNA-templated	PSMC5
GO:0006351_transcription, DNA-templated	PSMC6
GO:0006351_transcription, DNA-templated	PSMD1
GO:0006351_transcription, DNA-templated	PSMD2
GO:0006351_transcription, DNA-templated	PSMD3
GO:0006351_transcription, DNA-templated	PSMD4
GO:0006351_transcription, DNA-templated	PSMD5
GO:0006351_transcription, DNA-templated	PSMD7
GO:0006351_transcription, DNA-templated	PSMD8
GO:0006351_transcription, DNA-templated	PSMD9
GO:0006351_transcription, DNA-templated	PSMD10
GO:0006351_transcription, DNA-templated	PSMD11
GO:0006351_transcription, DNA-templated	PSMD12
GO:0006351_transcription, DNA-templated	PSMD13
GO:0006351_transcription, DNA-templated	PSME1
GO:0006351_transcription, DNA-templated	PSME2
GO:0006351_transcription, DNA-templated	PTAFR
GO:0006351_transcription, DNA-templated	PTCH1
GO:0006351_transcription, DNA-templated	PTEN
GO:0006351_transcription, DNA-templated	PTGIS
GO:0006351_transcription, DNA-templated	PTH
GO:0006351_transcription, DNA-templated	PTMA
GO:0006351_transcription, DNA-templated	PTPN2
GO:0006351_transcription, DNA-templated	PTPRK
GO:0006351_transcription, DNA-templated	PTPRN
GO:0006351_transcription, DNA-templated	PURA
GO:0006351_transcription, DNA-templated	PURB
GO:0006351_transcription, DNA-templated	PEX2
GO:0006351_transcription, DNA-templated	QARS1
GO:0006351_transcription, DNA-templated	RAD21
GO:0006351_transcription, DNA-templated	RAF1
GO:0006351_transcription, DNA-templated	RAN
GO:0006351_transcription, DNA-templated	RARA
GO:0006351_transcription, DNA-templated	RARB
GO:0006351_transcription, DNA-templated	RARG
GO:0006351_transcription, DNA-templated	RB1
GO:0006351_transcription, DNA-templated	ARID4A
GO:0006351_transcription, DNA-templated	KDM5A
GO:0006351_transcription, DNA-templated	RBBP7
GO:0006351_transcription, DNA-templated	RBBP8
GO:0006351_transcription, DNA-templated	RBL1
GO:0006351_transcription, DNA-templated	RBL2
GO:0006351_transcription, DNA-templated	REL
GO:0006351_transcription, DNA-templated	RELA
GO:0006351_transcription, DNA-templated	RELB
GO:0006351_transcription, DNA-templated	DPF2
GO:0006351_transcription, DNA-templated	REST
GO:0006351_transcription, DNA-templated	RET
GO:0006351_transcription, DNA-templated	RFC1
GO:0006351_transcription, DNA-templated	TRIM27
GO:0006351_transcription, DNA-templated	RFX1
GO:0006351_transcription, DNA-templated	RFX2
GO:0006351_transcription, DNA-templated	RFX3
GO:0006351_transcription, DNA-templated	RFX4
GO:0006351_transcription, DNA-templated	RFX5
GO:0006351_transcription, DNA-templated	RFXAP
GO:0006351_transcription, DNA-templated	RIT2
GO:0006351_transcription, DNA-templated	RING1
GO:0006351_transcription, DNA-templated	RLF
GO:0006351_transcription, DNA-templated	RNASEL
GO:0006351_transcription, DNA-templated	RNF2
GO:0006351_transcription, DNA-templated	BRD2
GO:0006351_transcription, DNA-templated	RNF4
GO:0006351_transcription, DNA-templated	RNF6
GO:0006351_transcription, DNA-templated	RORA
GO:0006351_transcription, DNA-templated	RORB
GO:0006351_transcription, DNA-templated	RORC
GO:0006351_transcription, DNA-templated	RPL6
GO:0006351_transcription, DNA-templated	RPL10
GO:0006351_transcription, DNA-templated	MRPL12
GO:0006351_transcription, DNA-templated	RPS3
GO:0006351_transcription, DNA-templated	RPS6KA1
GO:0006351_transcription, DNA-templated	RPS6KA3
GO:0006351_transcription, DNA-templated	RPS14
GO:0006351_transcription, DNA-templated	RPS27A
GO:0006351_transcription, DNA-templated	RREB1
GO:0006351_transcription, DNA-templated	RRM2
GO:0006351_transcription, DNA-templated	RSC1A1
GO:0006351_transcription, DNA-templated	RXRA
GO:0006351_transcription, DNA-templated	RXRB
GO:0006351_transcription, DNA-templated	RXRG
GO:0006351_transcription, DNA-templated	RYR2
GO:0006351_transcription, DNA-templated	S100A1
GO:0006351_transcription, DNA-templated	S100A8
GO:0006351_transcription, DNA-templated	S100A9
GO:0006351_transcription, DNA-templated	S100A12
GO:0006351_transcription, DNA-templated	SAFB
GO:0006351_transcription, DNA-templated	SALL2
GO:0006351_transcription, DNA-templated	SALL1
GO:0006351_transcription, DNA-templated	SARS1
GO:0006351_transcription, DNA-templated	SATB1
GO:0006351_transcription, DNA-templated	ATXN1
GO:0006351_transcription, DNA-templated	SCML1
GO:0006351_transcription, DNA-templated	XCL1
GO:0006351_transcription, DNA-templated	CX3CL1
GO:0006351_transcription, DNA-templated	TRAPPC2
GO:0006351_transcription, DNA-templated	SET
GO:0006351_transcription, DNA-templated	SFPQ
GO:0006351_transcription, DNA-templated	SFRP1
GO:0006351_transcription, DNA-templated	SFRP2
GO:0006351_transcription, DNA-templated	SFRP4
GO:0006351_transcription, DNA-templated	SFRP5
GO:0006351_transcription, DNA-templated	SGK1
GO:0006351_transcription, DNA-templated	SHC1
GO:0006351_transcription, DNA-templated	SHH
GO:0006351_transcription, DNA-templated	SHOX
GO:0006351_transcription, DNA-templated	SHOX2
GO:0006351_transcription, DNA-templated	SIM1
GO:0006351_transcription, DNA-templated	SIM2
GO:0006351_transcription, DNA-templated	SIX1
GO:0006351_transcription, DNA-templated	SIX3
GO:0006351_transcription, DNA-templated	SKI
GO:0006351_transcription, DNA-templated	SKIL
GO:0006351_transcription, DNA-templated	SLC9A1
GO:0006351_transcription, DNA-templated	SLC11A1
GO:0006351_transcription, DNA-templated	SNAI2
GO:0006351_transcription, DNA-templated	SMARCA1
GO:0006351_transcription, DNA-templated	SMARCA2
GO:0006351_transcription, DNA-templated	HLTF
GO:0006351_transcription, DNA-templated	SMARCA4
GO:0006351_transcription, DNA-templated	SMARCB1
GO:0006351_transcription, DNA-templated	SMARCC1
GO:0006351_transcription, DNA-templated	SMARCC2
GO:0006351_transcription, DNA-templated	SMARCD1
GO:0006351_transcription, DNA-templated	SMARCD2
GO:0006351_transcription, DNA-templated	SMARCD3
GO:0006351_transcription, DNA-templated	SMARCE1
GO:0006351_transcription, DNA-templated	SMN1
GO:0006351_transcription, DNA-templated	SMN2
GO:0006351_transcription, DNA-templated	SMO
GO:0006351_transcription, DNA-templated	SNAI1
GO:0006351_transcription, DNA-templated	SNAPC1
GO:0006351_transcription, DNA-templated	SNAPC2
GO:0006351_transcription, DNA-templated	SNAPC3
GO:0006351_transcription, DNA-templated	SNAPC4
GO:0006351_transcription, DNA-templated	SNCA
GO:0006351_transcription, DNA-templated	SNRPB
GO:0006351_transcription, DNA-templated	SNRPD3
GO:0006351_transcription, DNA-templated	SNRPE
GO:0006351_transcription, DNA-templated	SNRPF
GO:0006351_transcription, DNA-templated	SNRPG
GO:0006351_transcription, DNA-templated	SOD2
GO:0006351_transcription, DNA-templated	SORL1
GO:0006351_transcription, DNA-templated	SOX1
GO:0006351_transcription, DNA-templated	SOX2
GO:0006351_transcription, DNA-templated	SOX3
GO:0006351_transcription, DNA-templated	SOX4
GO:0006351_transcription, DNA-templated	SOX5
GO:0006351_transcription, DNA-templated	SOX9
GO:0006351_transcription, DNA-templated	SOX10
GO:0006351_transcription, DNA-templated	SOX11
GO:0006351_transcription, DNA-templated	SOX15
GO:0006351_transcription, DNA-templated	SOX12
GO:0006351_transcription, DNA-templated	SP1
GO:0006351_transcription, DNA-templated	SP2
GO:0006351_transcription, DNA-templated	SP3
GO:0006351_transcription, DNA-templated	SP4
GO:0006351_transcription, DNA-templated	SP100
GO:0006351_transcription, DNA-templated	SPI1
GO:0006351_transcription, DNA-templated	SPIB
GO:0006351_transcription, DNA-templated	SPP1
GO:0006351_transcription, DNA-templated	SRC
GO:0006351_transcription, DNA-templated	SRI
GO:0006351_transcription, DNA-templated	SREBF1
GO:0006351_transcription, DNA-templated	SREBF2
GO:0006351_transcription, DNA-templated	SRF
GO:0006351_transcription, DNA-templated	SRY
GO:0006351_transcription, DNA-templated	TRIM21
GO:0006351_transcription, DNA-templated	RO60
GO:0006351_transcription, DNA-templated	SSRP1
GO:0006351_transcription, DNA-templated	SSX1
GO:0006351_transcription, DNA-templated	SSX2
GO:0006351_transcription, DNA-templated	SSX5
GO:0006351_transcription, DNA-templated	SSX4
GO:0006351_transcription, DNA-templated	SS18
GO:0006351_transcription, DNA-templated	STAT1
GO:0006351_transcription, DNA-templated	STAT2
GO:0006351_transcription, DNA-templated	STAT3
GO:0006351_transcription, DNA-templated	STAT4
GO:0006351_transcription, DNA-templated	STAT5A
GO:0006351_transcription, DNA-templated	STAT5B
GO:0006351_transcription, DNA-templated	STAT6
GO:0006351_transcription, DNA-templated	NEK4
GO:0006351_transcription, DNA-templated	STK3
GO:0006351_transcription, DNA-templated	SUPT4H1
GO:0006351_transcription, DNA-templated	SUPT5H
GO:0006351_transcription, DNA-templated	SUPT6H
GO:0006351_transcription, DNA-templated	MED22
GO:0006351_transcription, DNA-templated	SUV39H1
GO:0006351_transcription, DNA-templated	SYK
GO:0006351_transcription, DNA-templated	TBXT
GO:0006351_transcription, DNA-templated	TADA2A
GO:0006351_transcription, DNA-templated	TAF1
GO:0006351_transcription, DNA-templated	TAF2
GO:0006351_transcription, DNA-templated	TAF4
GO:0006351_transcription, DNA-templated	TAF4B
GO:0006351_transcription, DNA-templated	TAF5
GO:0006351_transcription, DNA-templated	TAF6
GO:0006351_transcription, DNA-templated	TAF7
GO:0006351_transcription, DNA-templated	TAF9
GO:0006351_transcription, DNA-templated	TAF10
GO:0006351_transcription, DNA-templated	TAF11
GO:0006351_transcription, DNA-templated	TAF12
GO:0006351_transcription, DNA-templated	TAF13
GO:0006351_transcription, DNA-templated	MAP3K7
GO:0006351_transcription, DNA-templated	TAL1
GO:0006351_transcription, DNA-templated	TAL2
GO:0006351_transcription, DNA-templated	TARBP1
GO:0006351_transcription, DNA-templated	TBX1
GO:0006351_transcription, DNA-templated	TBL1X
GO:0006351_transcription, DNA-templated	TBP
GO:0006351_transcription, DNA-templated	TBX2
GO:0006351_transcription, DNA-templated	TBX5
GO:0006351_transcription, DNA-templated	TBX6
GO:0006351_transcription, DNA-templated	TBX15
GO:0006351_transcription, DNA-templated	TCEA1
GO:0006351_transcription, DNA-templated	TCEA2
GO:0006351_transcription, DNA-templated	TCEA3
GO:0006351_transcription, DNA-templated	ELOC
GO:0006351_transcription, DNA-templated	ELOB
GO:0006351_transcription, DNA-templated	ELOA
GO:0006351_transcription, DNA-templated	TCF4
GO:0006351_transcription, DNA-templated	TBX3
GO:0006351_transcription, DNA-templated	HNF1A
GO:0006351_transcription, DNA-templated	HNF1B
GO:0006351_transcription, DNA-templated	TCF3
GO:0006351_transcription, DNA-templated	TCF7
GO:0006351_transcription, DNA-templated	TCF7L2
GO:0006351_transcription, DNA-templated	ZEB1
GO:0006351_transcription, DNA-templated	GCFC2
GO:0006351_transcription, DNA-templated	TCF12
GO:0006351_transcription, DNA-templated	TCF15
GO:0006351_transcription, DNA-templated	ZNF354A
GO:0006351_transcription, DNA-templated	TCF19
GO:0006351_transcription, DNA-templated	TCF20
GO:0006351_transcription, DNA-templated	TCF21
GO:0006351_transcription, DNA-templated	VPS72
GO:0006351_transcription, DNA-templated	MLX
GO:0006351_transcription, DNA-templated	TCOF1
GO:0006351_transcription, DNA-templated	TDG
GO:0006351_transcription, DNA-templated	TDGF1
GO:0006351_transcription, DNA-templated	TDGF1P3
GO:0006351_transcription, DNA-templated	PRDX2
GO:0006351_transcription, DNA-templated	TEAD1
GO:0006351_transcription, DNA-templated	TEAD4
GO:0006351_transcription, DNA-templated	TEAD3
GO:0006351_transcription, DNA-templated	TEF
GO:0006351_transcription, DNA-templated	TMBIM6
GO:0006351_transcription, DNA-templated	TERF1
GO:0006351_transcription, DNA-templated	TERF2
GO:0006351_transcription, DNA-templated	TERT
GO:0006351_transcription, DNA-templated	TFAM
GO:0006351_transcription, DNA-templated	TFAP2A
GO:0006351_transcription, DNA-templated	TFAP2B
GO:0006351_transcription, DNA-templated	TFAP2C
GO:0006351_transcription, DNA-templated	TFAP4
GO:0006351_transcription, DNA-templated	TFCP2
GO:0006351_transcription, DNA-templated	NR2F1
GO:0006351_transcription, DNA-templated	NR2F2
GO:0006351_transcription, DNA-templated	TFDP1
GO:0006351_transcription, DNA-templated	TFDP2
GO:0006351_transcription, DNA-templated	TFE3
GO:0006351_transcription, DNA-templated	TFR2
GO:0006351_transcription, DNA-templated	TGFA
GO:0006351_transcription, DNA-templated	TGFB1
GO:0006351_transcription, DNA-templated	TGFB1I1
GO:0006351_transcription, DNA-templated	TGFB2
GO:0006351_transcription, DNA-templated	TGFB3
GO:0006351_transcription, DNA-templated	TGFBR1
GO:0006351_transcription, DNA-templated	TGFBR3
GO:0006351_transcription, DNA-templated	TGIF1
GO:0006351_transcription, DNA-templated	THRA
GO:0006351_transcription, DNA-templated	THRB
GO:0006351_transcription, DNA-templated	KLF10
GO:0006351_transcription, DNA-templated	TIAL1
GO:0006351_transcription, DNA-templated	NKX2-1
GO:0006351_transcription, DNA-templated	TLE1
GO:0006351_transcription, DNA-templated	TLE2
GO:0006351_transcription, DNA-templated	TLE3
GO:0006351_transcription, DNA-templated	TLE4
GO:0006351_transcription, DNA-templated	TLR2
GO:0006351_transcription, DNA-templated	TLR3
GO:0006351_transcription, DNA-templated	TLR4
GO:0006351_transcription, DNA-templated	NR2E1
GO:0006351_transcription, DNA-templated	TMF1
GO:0006351_transcription, DNA-templated	TMPO
GO:0006351_transcription, DNA-templated	TMSB4X
GO:0006351_transcription, DNA-templated	TNF
GO:0006351_transcription, DNA-templated	TNFAIP3
GO:0006351_transcription, DNA-templated	TNFRSF1A
GO:0006351_transcription, DNA-templated	TNNI2
GO:0006351_transcription, DNA-templated	TNP1
GO:0006351_transcription, DNA-templated	TOP2A
GO:0006351_transcription, DNA-templated	TP53
GO:0006351_transcription, DNA-templated	TP53BP1
GO:0006351_transcription, DNA-templated	TP73
GO:0006351_transcription, DNA-templated	TPR
GO:0006351_transcription, DNA-templated	NR2C1
GO:0006351_transcription, DNA-templated	NR2C2
GO:0006351_transcription, DNA-templated	TRAF1
GO:0006351_transcription, DNA-templated	TRAF2
GO:0006351_transcription, DNA-templated	TRAF3
GO:0006351_transcription, DNA-templated	TRAF5
GO:0006351_transcription, DNA-templated	TRAF6
GO:0006351_transcription, DNA-templated	TRPS1
GO:0006351_transcription, DNA-templated	TSG101
GO:0006351_transcription, DNA-templated	TTF1
GO:0006351_transcription, DNA-templated	TULP3
GO:0006351_transcription, DNA-templated	HIRA
GO:0006351_transcription, DNA-templated	TWIST1
GO:0006351_transcription, DNA-templated	TNFSF4
GO:0006351_transcription, DNA-templated	TNFRSF4
GO:0006351_transcription, DNA-templated	TXK
GO:0006351_transcription, DNA-templated	TXN
GO:0006351_transcription, DNA-templated	TYMS
GO:0006351_transcription, DNA-templated	UBA52
GO:0006351_transcription, DNA-templated	UBB
GO:0006351_transcription, DNA-templated	UBC
GO:0006351_transcription, DNA-templated	UBE2D1
GO:0006351_transcription, DNA-templated	UBE2D3
GO:0006351_transcription, DNA-templated	UBE2I
GO:0006351_transcription, DNA-templated	UBE2L3
GO:0006351_transcription, DNA-templated	UBE2N
GO:0006351_transcription, DNA-templated	UBE2V1
GO:0006351_transcription, DNA-templated	UBE3A
GO:0006351_transcription, DNA-templated	SUMO1
GO:0006351_transcription, DNA-templated	UBP1
GO:0006351_transcription, DNA-templated	UBTF
GO:0006351_transcription, DNA-templated	UCN
GO:0006351_transcription, DNA-templated	UCP1
GO:0006351_transcription, DNA-templated	SCGB1A1
GO:0006351_transcription, DNA-templated	NR1H2
GO:0006351_transcription, DNA-templated	USF1
GO:0006351_transcription, DNA-templated	USF2
GO:0006351_transcription, DNA-templated	VDR
GO:0006351_transcription, DNA-templated	VEGFA
GO:0006351_transcription, DNA-templated	VHL
GO:0006351_transcription, DNA-templated	EZR
GO:0006351_transcription, DNA-templated	TRPV1
GO:0006351_transcription, DNA-templated	WAS
GO:0006351_transcription, DNA-templated	WFS1
GO:0006351_transcription, DNA-templated	NSD2
GO:0006351_transcription, DNA-templated	NELFA
GO:0006351_transcription, DNA-templated	WNT1
GO:0006351_transcription, DNA-templated	WNT2
GO:0006351_transcription, DNA-templated	WNT5A
GO:0006351_transcription, DNA-templated	WNT6
GO:0006351_transcription, DNA-templated	WNT7A
GO:0006351_transcription, DNA-templated	WNT8A
GO:0006351_transcription, DNA-templated	WNT10B
GO:0006351_transcription, DNA-templated	WNT11
GO:0006351_transcription, DNA-templated	WT1
GO:0006351_transcription, DNA-templated	XBP1
GO:0006351_transcription, DNA-templated	XPO1
GO:0006351_transcription, DNA-templated	XRCC5
GO:0006351_transcription, DNA-templated	YES1
GO:0006351_transcription, DNA-templated	YY1
GO:0006351_transcription, DNA-templated	YWHAB
GO:0006351_transcription, DNA-templated	YWHAH
GO:0006351_transcription, DNA-templated	ZFP36
GO:0006351_transcription, DNA-templated	ZFP37
GO:0006351_transcription, DNA-templated	ZBTB14
GO:0006351_transcription, DNA-templated	ZFPL1
GO:0006351_transcription, DNA-templated	ZFX
GO:0006351_transcription, DNA-templated	ZFY
GO:0006351_transcription, DNA-templated	ZIC1
GO:0006351_transcription, DNA-templated	ZIC2
GO:0006351_transcription, DNA-templated	ZIC3
GO:0006351_transcription, DNA-templated	ZNF2
GO:0006351_transcription, DNA-templated	ZNF3
GO:0006351_transcription, DNA-templated	ZNF711
GO:0006351_transcription, DNA-templated	ZNF7
GO:0006351_transcription, DNA-templated	ZNF8
GO:0006351_transcription, DNA-templated	CNBP
GO:0006351_transcription, DNA-templated	ZNF10
GO:0006351_transcription, DNA-templated	ZNF12
GO:0006351_transcription, DNA-templated	ZNF14
GO:0006351_transcription, DNA-templated	ZNF708
GO:0006351_transcription, DNA-templated	ZNF16
GO:0006351_transcription, DNA-templated	ZNF17
GO:0006351_transcription, DNA-templated	ZNF18
GO:0006351_transcription, DNA-templated	ZNF19
GO:0006351_transcription, DNA-templated	ZNF20
GO:0006351_transcription, DNA-templated	ZNF182
GO:0006351_transcription, DNA-templated	ZNF22
GO:0006351_transcription, DNA-templated	ZNF23
GO:0006351_transcription, DNA-templated	ZNF24
GO:0006351_transcription, DNA-templated	ZNF26
GO:0006351_transcription, DNA-templated	ZNF28
GO:0006351_transcription, DNA-templated	ZSCAN20
GO:0006351_transcription, DNA-templated	ZNF32
GO:0006351_transcription, DNA-templated	ZNF33A
GO:0006351_transcription, DNA-templated	ZNF33B
GO:0006351_transcription, DNA-templated	ZNF35
GO:0006351_transcription, DNA-templated	ZKSCAN1
GO:0006351_transcription, DNA-templated	ZNF37A
GO:0006351_transcription, DNA-templated	ZSCAN21
GO:0006351_transcription, DNA-templated	ZNF41
GO:0006351_transcription, DNA-templated	MZF1
GO:0006351_transcription, DNA-templated	ZNF43
GO:0006351_transcription, DNA-templated	ZNF45
GO:0006351_transcription, DNA-templated	ZBTB25
GO:0006351_transcription, DNA-templated	ZNF56
GO:0006351_transcription, DNA-templated	ZNF66
GO:0006351_transcription, DNA-templated	ZNF69
GO:0006351_transcription, DNA-templated	ZNF70
GO:0006351_transcription, DNA-templated	ZNF74
GO:0006351_transcription, DNA-templated	ZNF75D
GO:0006351_transcription, DNA-templated	ZNF75A
GO:0006351_transcription, DNA-templated	ZNF76
GO:0006351_transcription, DNA-templated	ZNF79
GO:0006351_transcription, DNA-templated	ZNF80
GO:0006351_transcription, DNA-templated	ZNF84
GO:0006351_transcription, DNA-templated	ZNF221
GO:0006351_transcription, DNA-templated	ZNF85
GO:0006351_transcription, DNA-templated	ZNF90
GO:0006351_transcription, DNA-templated	ZNF91
GO:0006351_transcription, DNA-templated	ZNF99
GO:0006351_transcription, DNA-templated	ZNF222
GO:0006351_transcription, DNA-templated	ZNF121
GO:0006351_transcription, DNA-templated	ZNF124
GO:0006351_transcription, DNA-templated	ZNF131
GO:0006351_transcription, DNA-templated	ZNF132
GO:0006351_transcription, DNA-templated	ZNF133
GO:0006351_transcription, DNA-templated	ZNF134
GO:0006351_transcription, DNA-templated	ZNF135
GO:0006351_transcription, DNA-templated	ZNF136
GO:0006351_transcription, DNA-templated	ZNF138
GO:0006351_transcription, DNA-templated	ZNF140
GO:0006351_transcription, DNA-templated	ZNF141
GO:0006351_transcription, DNA-templated	ZNF142
GO:0006351_transcription, DNA-templated	ZNF143
GO:0006351_transcription, DNA-templated	PCGF2
GO:0006351_transcription, DNA-templated	ZBTB16
GO:0006351_transcription, DNA-templated	ZNF146
GO:0006351_transcription, DNA-templated	TRIM25
GO:0006351_transcription, DNA-templated	ZNF148
GO:0006351_transcription, DNA-templated	ZBTB17
GO:0006351_transcription, DNA-templated	ZNF154
GO:0006351_transcription, DNA-templated	ZNF155
GO:0006351_transcription, DNA-templated	ZNF157
GO:0006351_transcription, DNA-templated	VEZF1
GO:0006351_transcription, DNA-templated	ZNF165
GO:0006351_transcription, DNA-templated	TRIM26
GO:0006351_transcription, DNA-templated	ZNF174
GO:0006351_transcription, DNA-templated	ZNF175
GO:0006351_transcription, DNA-templated	ZNF177
GO:0006351_transcription, DNA-templated	ZNF180
GO:0006351_transcription, DNA-templated	ZNF184
GO:0006351_transcription, DNA-templated	ZSCAN26
GO:0006351_transcription, DNA-templated	ZNF189
GO:0006351_transcription, DNA-templated	ZKSCAN8
GO:0006351_transcription, DNA-templated	ZSCAN9
GO:0006351_transcription, DNA-templated	ZNF195
GO:0006351_transcription, DNA-templated	ZMYM2
GO:0006351_transcription, DNA-templated	ZNF200
GO:0006351_transcription, DNA-templated	ZNF202
GO:0006351_transcription, DNA-templated	ZNF205
GO:0006351_transcription, DNA-templated	ZNF207
GO:0006351_transcription, DNA-templated	ZNF208
GO:0006351_transcription, DNA-templated	ZNF213
GO:0006351_transcription, DNA-templated	ZNF214
GO:0006351_transcription, DNA-templated	ZNF215
GO:0006351_transcription, DNA-templated	ZNF217
GO:0006351_transcription, DNA-templated	ZNF223
GO:0006351_transcription, DNA-templated	ZNF224
GO:0006351_transcription, DNA-templated	ZNF225
GO:0006351_transcription, DNA-templated	ZNF226
GO:0006351_transcription, DNA-templated	ZNF227
GO:0006351_transcription, DNA-templated	ZNF112
GO:0006351_transcription, DNA-templated	ZNF229
GO:0006351_transcription, DNA-templated	ZNF230
GO:0006351_transcription, DNA-templated	ZNF232
GO:0006351_transcription, DNA-templated	ZNF236
GO:0006351_transcription, DNA-templated	ZP3
GO:0006351_transcription, DNA-templated	MAP3K12
GO:0006351_transcription, DNA-templated	ZXDA
GO:0006351_transcription, DNA-templated	PRDM2
GO:0006351_transcription, DNA-templated	LRP8
GO:0006351_transcription, DNA-templated	BTG2
GO:0006351_transcription, DNA-templated	PAX8
GO:0006351_transcription, DNA-templated	FZD5
GO:0006351_transcription, DNA-templated	BRPF1
GO:0006351_transcription, DNA-templated	USP7
GO:0006351_transcription, DNA-templated	SLBP
GO:0006351_transcription, DNA-templated	DEK
GO:0006351_transcription, DNA-templated	DDX39B
GO:0006351_transcription, DNA-templated	NELFE
GO:0006351_transcription, DNA-templated	TFEB
GO:0006351_transcription, DNA-templated	MAFK
GO:0006351_transcription, DNA-templated	MTERF1
GO:0006351_transcription, DNA-templated	ARHGEF5
GO:0006351_transcription, DNA-templated	ZNF212
GO:0006351_transcription, DNA-templated	KAT6A
GO:0006351_transcription, DNA-templated	NR4A3
GO:0006351_transcription, DNA-templated	BRD3
GO:0006351_transcription, DNA-templated	LHX3
GO:0006351_transcription, DNA-templated	MLLT10
GO:0006351_transcription, DNA-templated	NCOA4
GO:0006351_transcription, DNA-templated	CSRP3
GO:0006351_transcription, DNA-templated	FOSL1
GO:0006351_transcription, DNA-templated	FGF23
GO:0006351_transcription, DNA-templated	MLF2
GO:0006351_transcription, DNA-templated	KMT2D
GO:0006351_transcription, DNA-templated	YEATS4
GO:0006351_transcription, DNA-templated	HMGA2
GO:0006351_transcription, DNA-templated	ALX1
GO:0006351_transcription, DNA-templated	PABPN1
GO:0006351_transcription, DNA-templated	DPF3
GO:0006351_transcription, DNA-templated	TAF15
GO:0006351_transcription, DNA-templated	ELL
GO:0006351_transcription, DNA-templated	ZNF239
GO:0006351_transcription, DNA-templated	SYMPK
GO:0006351_transcription, DNA-templated	DPF1
GO:0006351_transcription, DNA-templated	GDF5
GO:0006351_transcription, DNA-templated	NCOA3
GO:0006351_transcription, DNA-templated	NRIP1
GO:0006351_transcription, DNA-templated	LZTR1
GO:0006351_transcription, DNA-templated	AKAP17A
GO:0006351_transcription, DNA-templated	USP9X
GO:0006351_transcription, DNA-templated	RBM10
GO:0006351_transcription, DNA-templated	KDM5C
GO:0006351_transcription, DNA-templated	LAGE3
GO:0006351_transcription, DNA-templated	KDM5D
GO:0006351_transcription, DNA-templated	USP9Y
GO:0006351_transcription, DNA-templated	ARID1A
GO:0006351_transcription, DNA-templated	H4C9
GO:0006351_transcription, DNA-templated	TRRAP
GO:0006351_transcription, DNA-templated	PICALM
GO:0006351_transcription, DNA-templated	AXIN1
GO:0006351_transcription, DNA-templated	BAP1
GO:0006351_transcription, DNA-templated	CDC45
GO:0006351_transcription, DNA-templated	EOMES
GO:0006351_transcription, DNA-templated	FZD1
GO:0006351_transcription, DNA-templated	FZD4
GO:0006351_transcription, DNA-templated	FZD6
GO:0006351_transcription, DNA-templated	FZD7
GO:0006351_transcription, DNA-templated	FZD8
GO:0006351_transcription, DNA-templated	GFI1B
GO:0006351_transcription, DNA-templated	H3C1
GO:0006351_transcription, DNA-templated	H3C4
GO:0006351_transcription, DNA-templated	H3C3
GO:0006351_transcription, DNA-templated	H3C6
GO:0006351_transcription, DNA-templated	H3C11
GO:0006351_transcription, DNA-templated	H3C8
GO:0006351_transcription, DNA-templated	H3C12
GO:0006351_transcription, DNA-templated	H3C10
GO:0006351_transcription, DNA-templated	H3C2
GO:0006351_transcription, DNA-templated	H4C1
GO:0006351_transcription, DNA-templated	H4C4
GO:0006351_transcription, DNA-templated	H4C6
GO:0006351_transcription, DNA-templated	H4C12
GO:0006351_transcription, DNA-templated	H4C11
GO:0006351_transcription, DNA-templated	H4C3
GO:0006351_transcription, DNA-templated	H4C8
GO:0006351_transcription, DNA-templated	H4C2
GO:0006351_transcription, DNA-templated	H4C5
GO:0006351_transcription, DNA-templated	H4C13
GO:0006351_transcription, DNA-templated	H4C14
GO:0006351_transcription, DNA-templated	PLA2G10
GO:0006351_transcription, DNA-templated	SOX14
GO:0006351_transcription, DNA-templated	UXT
GO:0006351_transcription, DNA-templated	ZNF282
GO:0006351_transcription, DNA-templated	NR0B2
GO:0006351_transcription, DNA-templated	UTF1
GO:0006351_transcription, DNA-templated	NCK2
GO:0006351_transcription, DNA-templated	CUL3
GO:0006351_transcription, DNA-templated	CUL2
GO:0006351_transcription, DNA-templated	FOXN1
GO:0006351_transcription, DNA-templated	TTF2
GO:0006351_transcription, DNA-templated	KLF11
GO:0006351_transcription, DNA-templated	TEAD2
GO:0006351_transcription, DNA-templated	SUPT3H
GO:0006351_transcription, DNA-templated	SMARCA5
GO:0006351_transcription, DNA-templated	OGT
GO:0006351_transcription, DNA-templated	GALR3
GO:0006351_transcription, DNA-templated	PPM1D
GO:0006351_transcription, DNA-templated	ITGA8
GO:0006351_transcription, DNA-templated	IKBKG
GO:0006351_transcription, DNA-templated	ELP1
GO:0006351_transcription, DNA-templated	HAT1
GO:0006351_transcription, DNA-templated	GCM1
GO:0006351_transcription, DNA-templated	GAS7
GO:0006351_transcription, DNA-templated	YBX3
GO:0006351_transcription, DNA-templated	CBX4
GO:0006351_transcription, DNA-templated	CAMK1
GO:0006351_transcription, DNA-templated	BARX2
GO:0006351_transcription, DNA-templated	LMO4
GO:0006351_transcription, DNA-templated	PIR
GO:0006351_transcription, DNA-templated	CGGBP1
GO:0006351_transcription, DNA-templated	BLZF1
GO:0006351_transcription, DNA-templated	BHLHE40
GO:0006351_transcription, DNA-templated	PIAS1
GO:0006351_transcription, DNA-templated	THOC5
GO:0006351_transcription, DNA-templated	KHSRP
GO:0006351_transcription, DNA-templated	CASK
GO:0006351_transcription, DNA-templated	STK16
GO:0006351_transcription, DNA-templated	TNFSF11
GO:0006351_transcription, DNA-templated	RUVBL1
GO:0006351_transcription, DNA-templated	KLF7
GO:0006351_transcription, DNA-templated	PLPP3
GO:0006351_transcription, DNA-templated	CDK13
GO:0006351_transcription, DNA-templated	RFXANK
GO:0006351_transcription, DNA-templated	TP63
GO:0006351_transcription, DNA-templated	SKAP1
GO:0006351_transcription, DNA-templated	CHRD
GO:0006351_transcription, DNA-templated	NCOA1
GO:0006351_transcription, DNA-templated	TNKS
GO:0006351_transcription, DNA-templated	HYAL2
GO:0006351_transcription, DNA-templated	TRADD
GO:0006351_transcription, DNA-templated	EDF1
GO:0006351_transcription, DNA-templated	URI1
GO:0006351_transcription, DNA-templated	EED
GO:0006351_transcription, DNA-templated	RNMT
GO:0006351_transcription, DNA-templated	RNGTT
GO:0006351_transcription, DNA-templated	RIPK1
GO:0006351_transcription, DNA-templated	RIPK2
GO:0006351_transcription, DNA-templated	FADD
GO:0006351_transcription, DNA-templated	TNFRSF11A
GO:0006351_transcription, DNA-templated	CREG1
GO:0006351_transcription, DNA-templated	TRIM24
GO:0006351_transcription, DNA-templated	IL18RAP
GO:0006351_transcription, DNA-templated	IL18R1
GO:0006351_transcription, DNA-templated	GALR2
GO:0006351_transcription, DNA-templated	CCNK
GO:0006351_transcription, DNA-templated	SAP30
GO:0006351_transcription, DNA-templated	HESX1
GO:0006351_transcription, DNA-templated	CFLAR
GO:0006351_transcription, DNA-templated	HDAC3
GO:0006351_transcription, DNA-templated	TSC22D1
GO:0006351_transcription, DNA-templated	KAT2B
GO:0006351_transcription, DNA-templated	CDK5R1
GO:0006351_transcription, DNA-templated	NR1I2
GO:0006351_transcription, DNA-templated	LDB1
GO:0006351_transcription, DNA-templated	APLN
GO:0006351_transcription, DNA-templated	PER3
GO:0006351_transcription, DNA-templated	PER2
GO:0006351_transcription, DNA-templated	SPHK1
GO:0006351_transcription, DNA-templated	SQSTM1
GO:0006351_transcription, DNA-templated	FUBP1
GO:0006351_transcription, DNA-templated	ZPR1
GO:0006351_transcription, DNA-templated	TAX1BP1
GO:0006351_transcription, DNA-templated	BUD31
GO:0006351_transcription, DNA-templated	CCNA1
GO:0006351_transcription, DNA-templated	TIMELESS
GO:0006351_transcription, DNA-templated	BCL10
GO:0006351_transcription, DNA-templated	FOXH1
GO:0006351_transcription, DNA-templated	PHOX2B
GO:0006351_transcription, DNA-templated	MBD2
GO:0006351_transcription, DNA-templated	FUBP3
GO:0006351_transcription, DNA-templated	BTRC
GO:0006351_transcription, DNA-templated	H3C7
GO:0006351_transcription, DNA-templated	H1-10
GO:0006351_transcription, DNA-templated	USP13
GO:0006351_transcription, DNA-templated	WASL
GO:0006351_transcription, DNA-templated	RPS6KA4
GO:0006351_transcription, DNA-templated	LIMD1
GO:0006351_transcription, DNA-templated	TNFSF18
GO:0006351_transcription, DNA-templated	TAF1C
GO:0006351_transcription, DNA-templated	TAF1B
GO:0006351_transcription, DNA-templated	TAF1A
GO:0006351_transcription, DNA-templated	RNF8
GO:0006351_transcription, DNA-templated	BAZ1B
GO:0006351_transcription, DNA-templated	UBA3
GO:0006351_transcription, DNA-templated	BTAF1
GO:0006351_transcription, DNA-templated	PIAS2
GO:0006351_transcription, DNA-templated	ASH2L
GO:0006351_transcription, DNA-templated	LDB2
GO:0006351_transcription, DNA-templated	DNAJA3
GO:0006351_transcription, DNA-templated	TBX19
GO:0006351_transcription, DNA-templated	TBX18
GO:0006351_transcription, DNA-templated	USP2
GO:0006351_transcription, DNA-templated	NMI
GO:0006351_transcription, DNA-templated	MTA1
GO:0006351_transcription, DNA-templated	PDLIM1
GO:0006351_transcription, DNA-templated	CBFA2T2
GO:0006351_transcription, DNA-templated	DYRK1B
GO:0006351_transcription, DNA-templated	CTDP1
GO:0006351_transcription, DNA-templated	MAP3K13
GO:0006351_transcription, DNA-templated	ARHGEF2
GO:0006351_transcription, DNA-templated	DDX21
GO:0006351_transcription, DNA-templated	ZBED1
GO:0006351_transcription, DNA-templated	SLC33A1
GO:0006351_transcription, DNA-templated	ZMYM4
GO:0006351_transcription, DNA-templated	ZMYM3
GO:0006351_transcription, DNA-templated	ZMYM5
GO:0006351_transcription, DNA-templated	LRRFIP1
GO:0006351_transcription, DNA-templated	LRRFIP2
GO:0006351_transcription, DNA-templated	BMP15
GO:0006351_transcription, DNA-templated	AURKB
GO:0006351_transcription, DNA-templated	MTA2
GO:0006351_transcription, DNA-templated	NOLC1
GO:0006351_transcription, DNA-templated	PTTG1
GO:0006351_transcription, DNA-templated	CCPG1
GO:0006351_transcription, DNA-templated	NOG
GO:0006351_transcription, DNA-templated	MSC
GO:0006351_transcription, DNA-templated	GCM2
GO:0006351_transcription, DNA-templated	RPS6KA5
GO:0006351_transcription, DNA-templated	ITGB1BP1
GO:0006351_transcription, DNA-templated	ZBTB22
GO:0006351_transcription, DNA-templated	MED14
GO:0006351_transcription, DNA-templated	ZNF235
GO:0006351_transcription, DNA-templated	KLF4
GO:0006351_transcription, DNA-templated	COPS2
GO:0006351_transcription, DNA-templated	TRIP13
GO:0006351_transcription, DNA-templated	TRIP11
GO:0006351_transcription, DNA-templated	HMGN3
GO:0006351_transcription, DNA-templated	TRIP4
GO:0006351_transcription, DNA-templated	ZNHIT3
GO:0006351_transcription, DNA-templated	GTF3C5
GO:0006351_transcription, DNA-templated	GTF3C4
GO:0006351_transcription, DNA-templated	GTF3C3
GO:0006351_transcription, DNA-templated	CNOT8
GO:0006351_transcription, DNA-templated	TCEAL1
GO:0006351_transcription, DNA-templated	RPL23
GO:0006351_transcription, DNA-templated	CER1
GO:0006351_transcription, DNA-templated	LHX2
GO:0006351_transcription, DNA-templated	ADIPOQ
GO:0006351_transcription, DNA-templated	CIAO1
GO:0006351_transcription, DNA-templated	TGFBRAP1
GO:0006351_transcription, DNA-templated	RECQL5
GO:0006351_transcription, DNA-templated	ZRANB2
GO:0006351_transcription, DNA-templated	MED21
GO:0006351_transcription, DNA-templated	HAND1
GO:0006351_transcription, DNA-templated	ZNF264
GO:0006351_transcription, DNA-templated	MED23
GO:0006351_transcription, DNA-templated	MED17
GO:0006351_transcription, DNA-templated	MED26
GO:0006351_transcription, DNA-templated	MED27
GO:0006351_transcription, DNA-templated	MED7
GO:0006351_transcription, DNA-templated	AIM2
GO:0006351_transcription, DNA-templated	EIF2AK3
GO:0006351_transcription, DNA-templated	FHL5
GO:0006351_transcription, DNA-templated	HAND2
GO:0006351_transcription, DNA-templated	MED20
GO:0006351_transcription, DNA-templated	MAPK8IP1
GO:0006351_transcription, DNA-templated	ONECUT2
GO:0006351_transcription, DNA-templated	PSMF1
GO:0006351_transcription, DNA-templated	TBX4
GO:0006351_transcription, DNA-templated	MAGED1
GO:0006351_transcription, DNA-templated	LITAF
GO:0006351_transcription, DNA-templated	GDF15
GO:0006351_transcription, DNA-templated	TBPL1
GO:0006351_transcription, DNA-templated	BAG3
GO:0006351_transcription, DNA-templated	POLR1C
GO:0006351_transcription, DNA-templated	ZNF254
GO:0006351_transcription, DNA-templated	CIR1
GO:0006351_transcription, DNA-templated	MACROH2A1
GO:0006351_transcription, DNA-templated	GTF2IRD1
GO:0006351_transcription, DNA-templated	NR1D1
GO:0006351_transcription, DNA-templated	GDF3
GO:0006351_transcription, DNA-templated	CLOCK
GO:0006351_transcription, DNA-templated	SOX13
GO:0006351_transcription, DNA-templated	CREB5
GO:0006351_transcription, DNA-templated	IER2
GO:0006351_transcription, DNA-templated	NFE2L3
GO:0006351_transcription, DNA-templated	RNF14
GO:0006351_transcription, DNA-templated	NCOR1
GO:0006351_transcription, DNA-templated	NCOR2
GO:0006351_transcription, DNA-templated	TESMIN
GO:0006351_transcription, DNA-templated	ZNF592
GO:0006351_transcription, DNA-templated	MORF4L2
GO:0006351_transcription, DNA-templated	MICAL2
GO:0006351_transcription, DNA-templated	CTR9
GO:0006351_transcription, DNA-templated	PPM1F
GO:0006351_transcription, DNA-templated	ZNF516
GO:0006351_transcription, DNA-templated	LPIN2
GO:0006351_transcription, DNA-templated	SAFB2
GO:0006351_transcription, DNA-templated	ZNF432
GO:0006351_transcription, DNA-templated	PHF14
GO:0006351_transcription, DNA-templated	KDM4A
GO:0006351_transcription, DNA-templated	LRRC14
GO:0006351_transcription, DNA-templated	VGLL4
GO:0006351_transcription, DNA-templated	ST18
GO:0006351_transcription, DNA-templated	ZNF646
GO:0006351_transcription, DNA-templated	DCAF1
GO:0006351_transcription, DNA-templated	HDAC9
GO:0006351_transcription, DNA-templated	ZNF536
GO:0006351_transcription, DNA-templated	ZSCAN12
GO:0006351_transcription, DNA-templated	KMT2B
GO:0006351_transcription, DNA-templated	HDAC4
GO:0006351_transcription, DNA-templated	TOX
GO:0006351_transcription, DNA-templated	ZFYVE16
GO:0006351_transcription, DNA-templated	BCLAF1
GO:0006351_transcription, DNA-templated	DLGAP5
GO:0006351_transcription, DNA-templated	SERTAD2
GO:0006351_transcription, DNA-templated	MAML1
GO:0006351_transcription, DNA-templated	KEAP1
GO:0006351_transcription, DNA-templated	TSC22D2
GO:0006351_transcription, DNA-templated	ARHGEF11
GO:0006351_transcription, DNA-templated	TRIM14
GO:0006351_transcription, DNA-templated	ZNF623
GO:0006351_transcription, DNA-templated	ZEB2
GO:0006351_transcription, DNA-templated	ZBTB24
GO:0006351_transcription, DNA-templated	ZNF518A
GO:0006351_transcription, DNA-templated	PSMD6
GO:0006351_transcription, DNA-templated	MED24
GO:0006351_transcription, DNA-templated	TRIM66
GO:0006351_transcription, DNA-templated	SETDB1
GO:0006351_transcription, DNA-templated	TOX4
GO:0006351_transcription, DNA-templated	ZBTB39
GO:0006351_transcription, DNA-templated	ZBED4
GO:0006351_transcription, DNA-templated	G3BP2
GO:0006351_transcription, DNA-templated	ARNT2
GO:0006351_transcription, DNA-templated	RNF10
GO:0006351_transcription, DNA-templated	ZBTB40
GO:0006351_transcription, DNA-templated	ZBTB5
GO:0006351_transcription, DNA-templated	MAFB
GO:0006351_transcription, DNA-templated	USP15
GO:0006351_transcription, DNA-templated	USP3
GO:0006351_transcription, DNA-templated	THRAP3
GO:0006351_transcription, DNA-templated	MED12
GO:0006351_transcription, DNA-templated	MED13
GO:0006351_transcription, DNA-templated	NR1I3
GO:0006351_transcription, DNA-templated	NR1H4
GO:0006351_transcription, DNA-templated	NR1D2
GO:0006351_transcription, DNA-templated	RBX1
GO:0006351_transcription, DNA-templated	THOC1
GO:0006351_transcription, DNA-templated	DMTF1
GO:0006351_transcription, DNA-templated	MED6
GO:0006351_transcription, DNA-templated	NR2E3
GO:0006351_transcription, DNA-templated	ZBTB33
GO:0006351_transcription, DNA-templated	HDAC6
GO:0006351_transcription, DNA-templated	HDAC5
GO:0006351_transcription, DNA-templated	MED16
GO:0006351_transcription, DNA-templated	MAMLD1
GO:0006351_transcription, DNA-templated	DNAJB6
GO:0006351_transcription, DNA-templated	NR1H3
GO:0006351_transcription, DNA-templated	PQBP1
GO:0006351_transcription, DNA-templated	ACTR3
GO:0006351_transcription, DNA-templated	ACTR2
GO:0006351_transcription, DNA-templated	TSFM
GO:0006351_transcription, DNA-templated	CTDSP2
GO:0006351_transcription, DNA-templated	HIPK3
GO:0006351_transcription, DNA-templated	ZNF263
GO:0006351_transcription, DNA-templated	NAMPT
GO:0006351_transcription, DNA-templated	YAF2
GO:0006351_transcription, DNA-templated	TOB1
GO:0006351_transcription, DNA-templated	CEBPZ
GO:0006351_transcription, DNA-templated	TRIM28
GO:0006351_transcription, DNA-templated	ZNF197
GO:0006351_transcription, DNA-templated	ZNF256
GO:0006351_transcription, DNA-templated	SORBS3
GO:0006351_transcription, DNA-templated	TENM1
GO:0006351_transcription, DNA-templated	ALYREF
GO:0006351_transcription, DNA-templated	RNF41
GO:0006351_transcription, DNA-templated	TSHZ1
GO:0006351_transcription, DNA-templated	PRMT3
GO:0006351_transcription, DNA-templated	PSME3
GO:0006351_transcription, DNA-templated	TRIM13
GO:0006351_transcription, DNA-templated	USPL1
GO:0006351_transcription, DNA-templated	TOPORS
GO:0006351_transcription, DNA-templated	FLOT1
GO:0006351_transcription, DNA-templated	PSMD14
GO:0006351_transcription, DNA-templated	SSX3
GO:0006351_transcription, DNA-templated	OLIG2
GO:0006351_transcription, DNA-templated	CTDSPL
GO:0006351_transcription, DNA-templated	TRIB1
GO:0006351_transcription, DNA-templated	ZNF443
GO:0006351_transcription, DNA-templated	DENND4A
GO:0006351_transcription, DNA-templated	IRX5
GO:0006351_transcription, DNA-templated	ZMPSTE24
GO:0006351_transcription, DNA-templated	FSTL3
GO:0006351_transcription, DNA-templated	STAG1
GO:0006351_transcription, DNA-templated	SAP18
GO:0006351_transcription, DNA-templated	TRAIP
GO:0006351_transcription, DNA-templated	SNAPC5
GO:0006351_transcription, DNA-templated	APBB3
GO:0006351_transcription, DNA-templated	ZNF267
GO:0006351_transcription, DNA-templated	TNIP1
GO:0006351_transcription, DNA-templated	IKZF1
GO:0006351_transcription, DNA-templated	TLR6
GO:0006351_transcription, DNA-templated	PCGF3
GO:0006351_transcription, DNA-templated	TRIM22
GO:0006351_transcription, DNA-templated	NPM3
GO:0006351_transcription, DNA-templated	HMG20B
GO:0006351_transcription, DNA-templated	HMG20A
GO:0006351_transcription, DNA-templated	KLF2
GO:0006351_transcription, DNA-templated	CITED2
GO:0006351_transcription, DNA-templated	IRF9
GO:0006351_transcription, DNA-templated	SCML2
GO:0006351_transcription, DNA-templated	NOD1
GO:0006351_transcription, DNA-templated	PIAS3
GO:0006351_transcription, DNA-templated	BASP1
GO:0006351_transcription, DNA-templated	YAP1
GO:0006351_transcription, DNA-templated	PRMT5
GO:0006351_transcription, DNA-templated	RBM14
GO:0006351_transcription, DNA-templated	C1D
GO:0006351_transcription, DNA-templated	N4BP2L2
GO:0006351_transcription, DNA-templated	MCRS1
GO:0006351_transcription, DNA-templated	PPIE
GO:0006351_transcription, DNA-templated	TAB1
GO:0006351_transcription, DNA-templated	HAX1
GO:0006351_transcription, DNA-templated	MAD2L2
GO:0006351_transcription, DNA-templated	SLC30A9
GO:0006351_transcription, DNA-templated	FST
GO:0006351_transcription, DNA-templated	ZBTB18
GO:0006351_transcription, DNA-templated	TADA3
GO:0006351_transcription, DNA-templated	TRIM38
GO:0006351_transcription, DNA-templated	HOXB13
GO:0006351_transcription, DNA-templated	C1orf61
GO:0006351_transcription, DNA-templated	CREB3
GO:0006351_transcription, DNA-templated	CARM1
GO:0006351_transcription, DNA-templated	NCOA2
GO:0006351_transcription, DNA-templated	SEMA4D
GO:0006351_transcription, DNA-templated	MYBBP1A
GO:0006351_transcription, DNA-templated	CIB1
GO:0006351_transcription, DNA-templated	ZNF211
GO:0006351_transcription, DNA-templated	DDX17
GO:0006351_transcription, DNA-templated	DEAF1
GO:0006351_transcription, DNA-templated	KAT5
GO:0006351_transcription, DNA-templated	BATF
GO:0006351_transcription, DNA-templated	HTATIP2
GO:0006351_transcription, DNA-templated	DRAP1
GO:0006351_transcription, DNA-templated	ERN2
GO:0006351_transcription, DNA-templated	USP16
GO:0006351_transcription, DNA-templated	MXD4
GO:0006351_transcription, DNA-templated	ERLIN1
GO:0006351_transcription, DNA-templated	HEXIM1
GO:0006351_transcription, DNA-templated	RBCK1
GO:0006351_transcription, DNA-templated	ARID3B
GO:0006351_transcription, DNA-templated	POLR3F
GO:0006351_transcription, DNA-templated	POLR3G
GO:0006351_transcription, DNA-templated	POLR3C
GO:0006351_transcription, DNA-templated	IVNS1ABP
GO:0006351_transcription, DNA-templated	TRIM16
GO:0006351_transcription, DNA-templated	TXNIP
GO:0006351_transcription, DNA-templated	TAF6L
GO:0006351_transcription, DNA-templated	RGS14
GO:0006351_transcription, DNA-templated	LEFTY1
GO:0006351_transcription, DNA-templated	CAMKK2
GO:0006351_transcription, DNA-templated	DMRT2
GO:0006351_transcription, DNA-templated	KHDRBS1
GO:0006351_transcription, DNA-templated	LBX1
GO:0006351_transcription, DNA-templated	KLF1
GO:0006351_transcription, DNA-templated	CTCF
GO:0006351_transcription, DNA-templated	GMEB1
GO:0006351_transcription, DNA-templated	TBR1
GO:0006351_transcription, DNA-templated	NFAT5
GO:0006351_transcription, DNA-templated	TCFL5
GO:0006351_transcription, DNA-templated	SIX2
GO:0006351_transcription, DNA-templated	RAI1
GO:0006351_transcription, DNA-templated	PHTF1
GO:0006351_transcription, DNA-templated	MAP3K2
GO:0006351_transcription, DNA-templated	KDM5B
GO:0006351_transcription, DNA-templated	ZMYND11
GO:0006351_transcription, DNA-templated	SRSF10
GO:0006351_transcription, DNA-templated	ZBTB6
GO:0006351_transcription, DNA-templated	ZNF234
GO:0006351_transcription, DNA-templated	ZNF266
GO:0006351_transcription, DNA-templated	ZNF274
GO:0006351_transcription, DNA-templated	ZNF273
GO:0006351_transcription, DNA-templated	ZNF460
GO:0006351_transcription, DNA-templated	ZNF268
GO:0006351_transcription, DNA-templated	ZNF275
GO:0006351_transcription, DNA-templated	SRCAP
GO:0006351_transcription, DNA-templated	PPP1R13L
GO:0006351_transcription, DNA-templated	CD3EAP
GO:0006351_transcription, DNA-templated	RUVBL2
GO:0006351_transcription, DNA-templated	LILRB1
GO:0006351_transcription, DNA-templated	ARID5A
GO:0006351_transcription, DNA-templated	PPARGC1A
GO:0006351_transcription, DNA-templated	MALT1
GO:0006351_transcription, DNA-templated	CPSF4
GO:0006351_transcription, DNA-templated	BRD8
GO:0006351_transcription, DNA-templated	PAPOLA
GO:0006351_transcription, DNA-templated	TCERG1
GO:0006351_transcription, DNA-templated	EHMT2
GO:0006351_transcription, DNA-templated	RNPS1
GO:0006351_transcription, DNA-templated	SUB1
GO:0006351_transcription, DNA-templated	SPIN1
GO:0006351_transcription, DNA-templated	MORF4L1
GO:0006351_transcription, DNA-templated	PRDX3
GO:0006351_transcription, DNA-templated	MSL3
GO:0006351_transcription, DNA-templated	CBX1
GO:0006351_transcription, DNA-templated	MLLT11
GO:0006351_transcription, DNA-templated	YWHAQ
GO:0006351_transcription, DNA-templated	ADIRF
GO:0006351_transcription, DNA-templated	CLP1
GO:0006351_transcription, DNA-templated	KCNQ1OT1
GO:0006351_transcription, DNA-templated	GCN1
GO:0006351_transcription, DNA-templated	COPS5
GO:0006351_transcription, DNA-templated	SLC38A3
GO:0006351_transcription, DNA-templated	LILRB4
GO:0006351_transcription, DNA-templated	CCDC85B
GO:0006351_transcription, DNA-templated	ATF7
GO:0006351_transcription, DNA-templated	VAX1
GO:0006351_transcription, DNA-templated	RIPK3
GO:0006351_transcription, DNA-templated	GTF2A1L
GO:0006351_transcription, DNA-templated	PIM2
GO:0006351_transcription, DNA-templated	MID2
GO:0006351_transcription, DNA-templated	ADRM1
GO:0006351_transcription, DNA-templated	NUDT21
GO:0006351_transcription, DNA-templated	WWP1
GO:0006351_transcription, DNA-templated	WWP2
GO:0006351_transcription, DNA-templated	SOX30
GO:0006351_transcription, DNA-templated	TRIM31
GO:0006351_transcription, DNA-templated	HSF2BP
GO:0006351_transcription, DNA-templated	DNAJB4
GO:0006351_transcription, DNA-templated	DIDO1
GO:0006351_transcription, DNA-templated	WDR5
GO:0006351_transcription, DNA-templated	PRDM7
GO:0006351_transcription, DNA-templated	PRDM5
GO:0006351_transcription, DNA-templated	PRDM4
GO:0006351_transcription, DNA-templated	FAF1
GO:0006351_transcription, DNA-templated	POLR3A
GO:0006351_transcription, DNA-templated	PWP1
GO:0006351_transcription, DNA-templated	PKIG
GO:0006351_transcription, DNA-templated	KAT7
GO:0006351_transcription, DNA-templated	PTP4A3
GO:0006351_transcription, DNA-templated	ERLIN2
GO:0006351_transcription, DNA-templated	SOX21
GO:0006351_transcription, DNA-templated	FSTL1
GO:0006351_transcription, DNA-templated	WDHD1
GO:0006351_transcription, DNA-templated	STRAP
GO:0006351_transcription, DNA-templated	BAZ2A
GO:0006351_transcription, DNA-templated	BAZ1A
GO:0006351_transcription, DNA-templated	LZTS1
GO:0006351_transcription, DNA-templated	ZNF277
GO:0006351_transcription, DNA-templated	CELF3
GO:0006351_transcription, DNA-templated	SUPT16H
GO:0006351_transcription, DNA-templated	CHEK2
GO:0006351_transcription, DNA-templated	IRAK3
GO:0006351_transcription, DNA-templated	DDX20
GO:0006351_transcription, DNA-templated	PADI2
GO:0006351_transcription, DNA-templated	PMF1
GO:0006351_transcription, DNA-templated	ZHX1
GO:0006351_transcription, DNA-templated	CHP1
GO:0006351_transcription, DNA-templated	SP140
GO:0006351_transcription, DNA-templated	SNF8
GO:0006351_transcription, DNA-templated	KLF12
GO:0006351_transcription, DNA-templated	KLF8
GO:0006351_transcription, DNA-templated	POU6F2
GO:0006351_transcription, DNA-templated	PARK7
GO:0006351_transcription, DNA-templated	RBPJL
GO:0006351_transcription, DNA-templated	ECD
GO:0006351_transcription, DNA-templated	PHB2
GO:0006351_transcription, DNA-templated	CBX3
GO:0006351_transcription, DNA-templated	TFEC
GO:0006351_transcription, DNA-templated	XRN2
GO:0006351_transcription, DNA-templated	IKZF3
GO:0006351_transcription, DNA-templated	IKZF2
GO:0006351_transcription, DNA-templated	ATF5
GO:0006351_transcription, DNA-templated	MTF2
GO:0006351_transcription, DNA-templated	SCAF8
GO:0006351_transcription, DNA-templated	ZNF652
GO:0006351_transcription, DNA-templated	ZFP30
GO:0006351_transcription, DNA-templated	ZNF507
GO:0006351_transcription, DNA-templated	CPEB3
GO:0006351_transcription, DNA-templated	ADNP2
GO:0006351_transcription, DNA-templated	ZNF510
GO:0006351_transcription, DNA-templated	MLXIP
GO:0006351_transcription, DNA-templated	MORC2
GO:0006351_transcription, DNA-templated	ZHX2
GO:0006351_transcription, DNA-templated	ABLIM3
GO:0006351_transcription, DNA-templated	FOXJ3
GO:0006351_transcription, DNA-templated	ZBTB1
GO:0006351_transcription, DNA-templated	BAHD1
GO:0006351_transcription, DNA-templated	CARD8
GO:0006351_transcription, DNA-templated	SBNO2
GO:0006351_transcription, DNA-templated	TRAK1
GO:0006351_transcription, DNA-templated	NCBP2
GO:0006351_transcription, DNA-templated	MAPRE3
GO:0006351_transcription, DNA-templated	ATF6
GO:0006351_transcription, DNA-templated	SIRT2
GO:0006351_transcription, DNA-templated	ELL2
GO:0006351_transcription, DNA-templated	SCAP
GO:0006351_transcription, DNA-templated	SNW1
GO:0006351_transcription, DNA-templated	DKK1
GO:0006351_transcription, DNA-templated	TRIM32
GO:0006351_transcription, DNA-templated	SCMH1
GO:0006351_transcription, DNA-templated	PAXIP1
GO:0006351_transcription, DNA-templated	TCF25
[truncated: 20,944 more rows]
