# Supplementary material for: Identification of COVID-19 Infection-Related Human Genes Based on a Random Walk Model in a Virus–Human Protein Interaction Network
Source: Biomed Res Int. 2020 Jul 8;2020:4256301. doi: 10.1155/2020/4256301 (PMC7345912; doi:10.1155/2020/4256301)
Supplement: Supplementary Materials — Supplementary File 1: the sequences of COVID-19 proteins. Supplementary File 2: the predicted domains and GO functions of COVID-19 proteins by InterProScan. Supplementary File 3: the GO terms with level ≥ 3 of COVID-19 proteins. Supplementary File 4: the candidate human proteins shared the same GO functions of COVID-19. Supplementary File 5: the mapped COVID-19 candidate human proteins on STRING network. Supplementary File 6: the highly confident human proteins associated with infection of COVID-19. [file 4256301.f1.zip › Supp 5.xlsx]

## Sheet: Ensembl_String10.0
ENSP00000000412
ENSP00000000442
ENSP00000001008
ENSP00000002125
ENSP00000002829
ENSP00000003084
ENSP00000003100
ENSP00000003302
ENSP00000004103
ENSP00000004531
ENSP00000005178
ENSP00000005284
ENSP00000005286
ENSP00000005340
ENSP00000005995
ENSP00000006015
ENSP00000006053
ENSP00000006777
ENSP00000007264
ENSP00000007414
ENSP00000007699
ENSP00000007722
ENSP00000008391
ENSP00000008527
ENSP00000008938
ENSP00000009041
ENSP00000009105
ENSP00000009180
ENSP00000009530
ENSP00000010132
ENSP00000010404
ENSP00000011292
ENSP00000011473
ENSP00000011653
ENSP00000011691
ENSP00000011898
ENSP00000012049
ENSP00000012134
ENSP00000012443
ENSP00000013034
ENSP00000013070
ENSP00000013125
ENSP00000013222
ENSP00000013807
ENSP00000014914
ENSP00000014935
ENSP00000016171
ENSP00000016913
ENSP00000017003
ENSP00000019103
ENSP00000020926
ENSP00000020945
ENSP00000023064
ENSP00000023897
ENSP00000024061
ENSP00000026218
ENSP00000027335
ENSP00000029410
ENSP00000035307
ENSP00000035383
ENSP00000037243
ENSP00000040584
ENSP00000040877
ENSP00000042931
ENSP00000043402
ENSP00000044462
ENSP00000052754
ENSP00000053243
ENSP00000053867
ENSP00000054650
ENSP00000054666
ENSP00000055077
ENSP00000055335
ENSP00000056217
ENSP00000056233
ENSP00000057513
ENSP00000061240
ENSP00000064724
ENSP00000064780
ENSP00000070846
ENSP00000072644
ENSP00000072869
ENSP00000075120
ENSP00000075503
ENSP00000078445
ENSP00000078527
ENSP00000080059
ENSP00000081029
ENSP00000084798
ENSP00000085219
ENSP00000086933
ENSP00000155093
ENSP00000155840
ENSP00000155858
ENSP00000155926
ENSP00000156084
ENSP00000156109
ENSP00000156471
ENSP00000156499
ENSP00000156626
ENSP00000156825
ENSP00000157600
ENSP00000157812
ENSP00000158166
ENSP00000158771
ENSP00000159060
ENSP00000159087
ENSP00000160262
ENSP00000160382
ENSP00000160740
ENSP00000160827
ENSP00000161006
ENSP00000161559
ENSP00000161863
ENSP00000162044
ENSP00000162391
ENSP00000162749
ENSP00000163416
ENSP00000164024
ENSP00000164133
ENSP00000164227
ENSP00000164305
ENSP00000166139
ENSP00000166244
ENSP00000166345
ENSP00000167106
ENSP00000168148
ENSP00000168216
ENSP00000168712
ENSP00000168977
ENSP00000169298
ENSP00000169551
ENSP00000170168
ENSP00000170447
ENSP00000170564
ENSP00000170630
ENSP00000171111
ENSP00000171214
ENSP00000171757
ENSP00000171887
ENSP00000172229
ENSP00000174618
ENSP00000175091
ENSP00000175238
ENSP00000175506
ENSP00000176183
ENSP00000176763
ENSP00000177648
ENSP00000177694
ENSP00000178638
ENSP00000178640
ENSP00000181383
ENSP00000181839
ENSP00000182290
ENSP00000182377
ENSP00000182527
ENSP00000183605
ENSP00000184266
ENSP00000184956
ENSP00000185150
ENSP00000185206
ENSP00000186436
ENSP00000187397
ENSP00000187762
ENSP00000188790
ENSP00000190165
ENSP00000192314
ENSP00000193322
ENSP00000193391
ENSP00000194130
ENSP00000194152
ENSP00000194155
ENSP00000194530
ENSP00000196482
ENSP00000196489
ENSP00000196548
ENSP00000196551
ENSP00000198536
ENSP00000198765
ENSP00000198767
ENSP00000198801
ENSP00000199280
ENSP00000199320
ENSP00000199389
ENSP00000199706
ENSP00000199814
ENSP00000199936
ENSP00000200135
ENSP00000200181
ENSP00000200457
ENSP00000200557
ENSP00000200652
ENSP00000200691
ENSP00000201031
ENSP00000201586
ENSP00000202773
ENSP00000202816
ENSP00000202967
ENSP00000203001
ENSP00000203629
ENSP00000203630
ENSP00000203664
ENSP00000204517
ENSP00000204604
ENSP00000204961
ENSP00000205061
ENSP00000205143
ENSP00000205194
ENSP00000205214
ENSP00000205402
ENSP00000205557
ENSP00000205636
ENSP00000205890
ENSP00000205948
ENSP00000206020
ENSP00000206249
ENSP00000206380
ENSP00000206513
ENSP00000206544
ENSP00000207157
ENSP00000207870
ENSP00000209540
ENSP00000209668
ENSP00000209728
ENSP00000209873
ENSP00000209875
ENSP00000209884
ENSP00000210313
ENSP00000210633
ENSP00000211076
ENSP00000211287
ENSP00000211314
ENSP00000211413
ENSP00000211936
ENSP00000212015
ENSP00000212355
ENSP00000214869
ENSP00000215057
ENSP00000215071
ENSP00000215095
ENSP00000215567
ENSP00000215570
ENSP00000215574
ENSP00000215587
ENSP00000215591
ENSP00000215637
ENSP00000215659
ENSP00000215727
ENSP00000215730
ENSP00000215739
ENSP00000215742
ENSP00000215743
ENSP00000215781
ENSP00000215793
ENSP00000215794
ENSP00000215829
ENSP00000215832
ENSP00000215862
ENSP00000215882
ENSP00000215906
ENSP00000215909
ENSP00000215912
ENSP00000216024
ENSP00000216029
ENSP00000216034
ENSP00000216037
ENSP00000216039
ENSP00000216044
ENSP00000216085
ENSP00000216099
ENSP00000216106
ENSP00000216115
ENSP00000216117
ENSP00000216122
ENSP00000216129
ENSP00000216133
ENSP00000216139
ENSP00000216144
ENSP00000216160
ENSP00000216180
ENSP00000216181
ENSP00000216187
ENSP00000216190
ENSP00000216211
ENSP00000216214
ENSP00000216223
ENSP00000216225
ENSP00000216237
ENSP00000216252
ENSP00000216264
ENSP00000216268
ENSP00000216271
ENSP00000216274
ENSP00000216277
ENSP00000216294
ENSP00000216297
ENSP00000216330
ENSP00000216336
ENSP00000216338
ENSP00000216341
ENSP00000216367
ENSP00000216373
ENSP00000216392
ENSP00000216455
ENSP00000216484
ENSP00000216489
ENSP00000216513
ENSP00000216540
ENSP00000216554
ENSP00000216629
ENSP00000216639
ENSP00000216714
ENSP00000216727
ENSP00000216774
ENSP00000216797
ENSP00000216799
ENSP00000216802
ENSP00000216807
ENSP00000216832
ENSP00000216840
ENSP00000216911
ENSP00000216923
ENSP00000216951
ENSP00000216968
ENSP00000217026
ENSP00000217043
ENSP00000217073
ENSP00000217086
ENSP00000217109
ENSP00000217121
ENSP00000217130
ENSP00000217131
ENSP00000217159
ENSP00000217169
ENSP00000217182
ENSP00000217185
ENSP00000217188
ENSP00000217233
ENSP00000217244
ENSP00000217254
ENSP00000217270
ENSP00000217299
ENSP00000217402
ENSP00000217420
ENSP00000217423
ENSP00000217428
ENSP00000217446
ENSP00000217456
ENSP00000217740
ENSP00000217893
ENSP00000217901
ENSP00000217909
ENSP00000217958
ENSP00000217961
ENSP00000217964
ENSP00000217971
ENSP00000217999
ENSP00000218006
ENSP00000218008
ENSP00000218032
ENSP00000218075
ENSP00000218099
ENSP00000218104
ENSP00000218176
ENSP00000218197
ENSP00000218224
ENSP00000218230
ENSP00000218316
ENSP00000218348
ENSP00000218364
ENSP00000218388
ENSP00000218436
ENSP00000218548
ENSP00000218652
ENSP00000218721
ENSP00000218758
ENSP00000218867
ENSP00000218894
ENSP00000219054
ENSP00000219066
ENSP00000219069
ENSP00000219070
ENSP00000219091
ENSP00000219097
ENSP00000219150
ENSP00000219172
ENSP00000219207
ENSP00000219240
ENSP00000219252
ENSP00000219271
ENSP00000219281
ENSP00000219301
ENSP00000219302
ENSP00000219313
ENSP00000219315
ENSP00000219320
ENSP00000219334
ENSP00000219343
ENSP00000219368
ENSP00000219431
ENSP00000219454
ENSP00000219473
ENSP00000219478
ENSP00000219479
ENSP00000219548
ENSP00000219551
ENSP00000219593
ENSP00000219596
ENSP00000219599
ENSP00000219660
ENSP00000219689
ENSP00000219746
ENSP00000219782
ENSP00000219789
ENSP00000219794
ENSP00000219833
ENSP00000219837
ENSP00000219905
ENSP00000219919
ENSP00000220003
ENSP00000220166
ENSP00000220325
ENSP00000220429
ENSP00000220478
ENSP00000220496
ENSP00000220509
ENSP00000220562
ENSP00000220584
ENSP00000220592
ENSP00000220597
ENSP00000220659
ENSP00000220669
ENSP00000220751
ENSP00000220763
ENSP00000220772
ENSP00000220809
ENSP00000220822
ENSP00000220849
ENSP00000220853
ENSP00000220913
ENSP00000221132
ENSP00000221138
ENSP00000221232
ENSP00000221233
ENSP00000221265
ENSP00000221307
ENSP00000221315
ENSP00000221327
ENSP00000221419
ENSP00000221421
ENSP00000221444
ENSP00000221452
ENSP00000221466
ENSP00000221476
ENSP00000221480
ENSP00000221485
ENSP00000221486
ENSP00000221494
ENSP00000221496
ENSP00000221566
ENSP00000221573
ENSP00000221665
ENSP00000221722
ENSP00000221730
ENSP00000221740
ENSP00000221742
ENSP00000221801
ENSP00000221804
ENSP00000221847
ENSP00000221859
ENSP00000221891
ENSP00000221922
ENSP00000221930
ENSP00000221954
ENSP00000221972
ENSP00000221973
ENSP00000221978
ENSP00000221980
ENSP00000221992
ENSP00000221996
ENSP00000222008
ENSP00000222033
ENSP00000222115
ENSP00000222122
ENSP00000222139
ENSP00000222212
ENSP00000222219
ENSP00000222247
ENSP00000222248
ENSP00000222254
ENSP00000222256
ENSP00000222266
ENSP00000222271
ENSP00000222275
ENSP00000222284
ENSP00000222304
ENSP00000222305
ENSP00000222308
ENSP00000222329
ENSP00000222330
ENSP00000222374
ENSP00000222388
ENSP00000222390
ENSP00000222402
ENSP00000222481
ENSP00000222482
ENSP00000222511
ENSP00000222543
ENSP00000222547
ENSP00000222553
ENSP00000222567
ENSP00000222573
ENSP00000222574
ENSP00000222584
ENSP00000222598
ENSP00000222693
ENSP00000222718
ENSP00000222725
ENSP00000222726
ENSP00000222728
ENSP00000222747
ENSP00000222753
ENSP00000222812
ENSP00000222823
ENSP00000222968
ENSP00000222969
ENSP00000223023
ENSP00000223026
ENSP00000223051
ENSP00000223054
ENSP00000223061
ENSP00000223073
ENSP00000223095
ENSP00000223114
ENSP00000223122
ENSP00000223129
ENSP00000223136
ENSP00000223190
ENSP00000223210
ENSP00000223215
ENSP00000223321
ENSP00000223324
ENSP00000223336
ENSP00000223357
ENSP00000223366
ENSP00000223369
ENSP00000223428
ENSP00000223459
ENSP00000223500
ENSP00000223528
ENSP00000223641
ENSP00000223642
ENSP00000223795
ENSP00000223864
ENSP00000224073
ENSP00000224140
ENSP00000224181
ENSP00000224237
ENSP00000224600
ENSP00000224652
ENSP00000224784
ENSP00000224807
ENSP00000224862
ENSP00000225174
ENSP00000225276
ENSP00000225296
ENSP00000225298
ENSP00000225328
ENSP00000225388
ENSP00000225396
ENSP00000225402
ENSP00000225410
ENSP00000225426
ENSP00000225430
ENSP00000225474
ENSP00000225504
ENSP00000225519
ENSP00000225538
ENSP00000225567
ENSP00000225576
ENSP00000225577
ENSP00000225603
ENSP00000225609
ENSP00000225614
ENSP00000225648
ENSP00000225655
ENSP00000225665
ENSP00000225688
ENSP00000225698
ENSP00000225719
ENSP00000225724
ENSP00000225726
ENSP00000225728
ENSP00000225729
ENSP00000225740
ENSP00000225777
ENSP00000225792
ENSP00000225823
ENSP00000225831
ENSP00000225873
ENSP00000225893
ENSP00000225916
ENSP00000225964
ENSP00000225969
ENSP00000225972
ENSP00000225983
ENSP00000226021
ENSP00000226067
ENSP00000226091
ENSP00000226207
ENSP00000226209
ENSP00000226218
ENSP00000226225
ENSP00000226230
ENSP00000226247
ENSP00000226279
ENSP00000226299
ENSP00000226382
ENSP00000226413
ENSP00000226432
ENSP00000226460
ENSP00000226574
ENSP00000226730
ENSP00000226760
ENSP00000226796
ENSP00000226798
ENSP00000227155
ENSP00000227163
ENSP00000227251
ENSP00000227256
ENSP00000227266
ENSP00000227348
ENSP00000227378
ENSP00000227451
ENSP00000227471
ENSP00000227474
ENSP00000227495
ENSP00000227507
ENSP00000227520
ENSP00000227524
ENSP00000227525
ENSP00000227618
ENSP00000227638
ENSP00000227752
ENSP00000227756
ENSP00000227758
ENSP00000227880
ENSP00000228027
ENSP00000228251
ENSP00000228280
ENSP00000228284
ENSP00000228289
ENSP00000228318
ENSP00000228347
ENSP00000228434
ENSP00000228437
ENSP00000228438
ENSP00000228463
ENSP00000228468
ENSP00000228495
ENSP00000228506
ENSP00000228510
ENSP00000228515
ENSP00000228534
ENSP00000228567
ENSP00000228641
ENSP00000228644
ENSP00000228682
ENSP00000228740
ENSP00000228741
ENSP00000228843
ENSP00000228865
ENSP00000228872
ENSP00000228887
ENSP00000228918
ENSP00000228928
ENSP00000229030
ENSP00000229134
ENSP00000229135
ENSP00000229179
ENSP00000229195
ENSP00000229214
ENSP00000229239
ENSP00000229251
ENSP00000229266
ENSP00000229268
ENSP00000229304
ENSP00000229307
ENSP00000229314
ENSP00000229330
ENSP00000229332
ENSP00000229335
ENSP00000229390
ENSP00000229402
ENSP00000229416
ENSP00000229447
ENSP00000229563
ENSP00000229570
ENSP00000229583
ENSP00000229595
ENSP00000229729
ENSP00000229758
ENSP00000229794
ENSP00000229812
ENSP00000229829
ENSP00000229854
ENSP00000229903
ENSP00000229955
ENSP00000229971
ENSP00000230036
ENSP00000230050
ENSP00000230053
ENSP00000230056
ENSP00000230085
ENSP00000230099
ENSP00000230122
ENSP00000230256
ENSP00000230321
ENSP00000230323
ENSP00000230340
ENSP00000230354
ENSP00000230381
ENSP00000230419
ENSP00000230461
ENSP00000230565
ENSP00000230582
ENSP00000230588
ENSP00000230658
ENSP00000230671
ENSP00000230732
ENSP00000230771
ENSP00000230882
ENSP00000230895
ENSP00000230990
ENSP00000231009
ENSP00000231021
ENSP00000231121
ENSP00000231130
ENSP00000231134
ENSP00000231136
ENSP00000231137
ENSP00000231173
ENSP00000231188
ENSP00000231198
ENSP00000231357
ENSP00000231368
ENSP00000231449
ENSP00000231454
ENSP00000231461
ENSP00000231484
ENSP00000231487
ENSP00000231498
ENSP00000231509
ENSP00000231512
ENSP00000231524
ENSP00000231656
ENSP00000231668
ENSP00000231706
ENSP00000231721
ENSP00000231751
ENSP00000231790
ENSP00000231948
ENSP00000232003
ENSP00000232014
ENSP00000232375
ENSP00000232424
ENSP00000232508
ENSP00000232603
ENSP00000232744
ENSP00000232854
ENSP00000232888
ENSP00000232892
ENSP00000232905
ENSP00000232974
ENSP00000233025
ENSP00000233027
ENSP00000233047
ENSP00000233055
ENSP00000233057
ENSP00000233078
ENSP00000233084
ENSP00000233121
ENSP00000233146
ENSP00000233154
ENSP00000233156
ENSP00000233202
ENSP00000233331
ENSP00000233336
ENSP00000233535
ENSP00000233545
ENSP00000233557
ENSP00000233596
ENSP00000233616
ENSP00000233630
ENSP00000233638
ENSP00000233712
ENSP00000233714
ENSP00000233826
ENSP00000233838
ENSP00000233893
ENSP00000233944
ENSP00000233946
ENSP00000233948
ENSP00000233954
ENSP00000233957
ENSP00000233969
ENSP00000233997
ENSP00000234040
ENSP00000234071
ENSP00000234091
ENSP00000234142
ENSP00000234170
ENSP00000234179
ENSP00000234195
ENSP00000234198
ENSP00000234256
ENSP00000234296
ENSP00000234310
ENSP00000234347
ENSP00000234371
ENSP00000234389
ENSP00000234392
ENSP00000234396
ENSP00000234420
ENSP00000234488
ENSP00000234590
ENSP00000234626
ENSP00000234701
ENSP00000234739
ENSP00000234798
ENSP00000234800
ENSP00000234827
ENSP00000234831
ENSP00000234961
ENSP00000235090
ENSP00000235310
ENSP00000235329
ENSP00000235345
ENSP00000235347
ENSP00000235349
ENSP00000235372
ENSP00000235521
ENSP00000236137
ENSP00000236147
ENSP00000236192
ENSP00000236273
ENSP00000236495
ENSP00000236671
ENSP00000236709
ENSP00000236826
ENSP00000236877
ENSP00000236957
ENSP00000236979
ENSP00000236980
ENSP00000237201
ENSP00000237264
ENSP00000237281
ENSP00000237283
ENSP00000237289
ENSP00000237316
ENSP00000237449
ENSP00000237455
ENSP00000237530
ENSP00000237596
ENSP00000237612
ENSP00000237696
ENSP00000237837
ENSP00000237853
ENSP00000237889
ENSP00000237937
ENSP00000238018
ENSP00000238081
ENSP00000238112
ENSP00000238146
ENSP00000238497
ENSP00000238508
ENSP00000238558
ENSP00000238561
ENSP00000238609
ENSP00000238616
ENSP00000238647
ENSP00000238667
ENSP00000238682
ENSP00000238714
ENSP00000238738
ENSP00000238788
ENSP00000238789
ENSP00000238823
ENSP00000238831
ENSP00000239027
ENSP00000239032
ENSP00000239144
ENSP00000239151
ENSP00000239165
ENSP00000239231
ENSP00000239243
ENSP00000239367
ENSP00000239444
ENSP00000239446
ENSP00000239449
ENSP00000239450
ENSP00000239451
ENSP00000239461
ENSP00000239587
ENSP00000239666
ENSP00000239761
ENSP00000239849
ENSP00000239882
ENSP00000239891
ENSP00000239938
ENSP00000239944
ENSP00000240055
ENSP00000240093
ENSP00000240123
ENSP00000240185
ENSP00000240189
ENSP00000240285
ENSP00000240304
ENSP00000240306
ENSP00000240316
ENSP00000240327
ENSP00000240328
ENSP00000240333
ENSP00000240335
ENSP00000240361
ENSP00000240488
ENSP00000240499
ENSP00000240587
ENSP00000240615
ENSP00000240618
ENSP00000240619
ENSP00000240662
ENSP00000240687
ENSP00000240691
ENSP00000240731
ENSP00000240874
ENSP00000240986
ENSP00000241014
ENSP00000241041
ENSP00000241052
ENSP00000241124
ENSP00000241125
ENSP00000241256
ENSP00000241261
ENSP00000241274
ENSP00000241305
ENSP00000241312
ENSP00000241416
ENSP00000241436
ENSP00000241453
ENSP00000241463
ENSP00000241502
ENSP00000241651
ENSP00000241808
ENSP00000242057
ENSP00000242108
ENSP00000242159
ENSP00000242208
ENSP00000242248
ENSP00000242249
ENSP00000242261
ENSP00000242275
ENSP00000242338
ENSP00000242351
ENSP00000242462
ENSP00000242465
ENSP00000242480
ENSP00000242576
ENSP00000242607
ENSP00000242719
ENSP00000242728
ENSP00000242729
ENSP00000242776
ENSP00000242804
ENSP00000242827
ENSP00000242839
ENSP00000242994
ENSP00000243045
ENSP00000243056
ENSP00000243077
ENSP00000243103
ENSP00000243108
ENSP00000243167
ENSP00000243213
ENSP00000243253
ENSP00000243326
ENSP00000243344
ENSP00000243346
ENSP00000243349
ENSP00000243389
ENSP00000243440
ENSP00000243457
ENSP00000243563
ENSP00000243611
ENSP00000243643
ENSP00000243644
ENSP00000243673
ENSP00000243776
ENSP00000243896
ENSP00000243903
ENSP00000243911
ENSP00000243913
ENSP00000243914
ENSP00000243918
ENSP00000243924
ENSP00000243938
ENSP00000244020
ENSP00000244043
ENSP00000244050
ENSP00000244051
ENSP00000244137
ENSP00000244174
ENSP00000244221
ENSP00000244227
ENSP00000244230
ENSP00000244333
ENSP00000244364
ENSP00000244426
ENSP00000244496
ENSP00000244513
ENSP00000244519
ENSP00000244520
ENSP00000244527
ENSP00000244565
ENSP00000244571
ENSP00000244576
ENSP00000244623
ENSP00000244669
ENSP00000244709
ENSP00000244741
ENSP00000244745
ENSP00000244763
ENSP00000244769
ENSP00000244869
ENSP00000245046
ENSP00000245121
ENSP00000245185
ENSP00000245206
ENSP00000245222
ENSP00000245255
ENSP00000245312
ENSP00000245323
ENSP00000245407
ENSP00000245414
ENSP00000245451
ENSP00000245457
ENSP00000245479
ENSP00000245503
ENSP00000245539
ENSP00000245544
ENSP00000245551
ENSP00000245615
ENSP00000245620
ENSP00000245663
ENSP00000245680
ENSP00000245787
ENSP00000245816
ENSP00000245817
ENSP00000245838
ENSP00000245903
ENSP00000245907
ENSP00000245919
ENSP00000245923
ENSP00000245934
ENSP00000246006
ENSP00000246012
ENSP00000246020
ENSP00000246024
ENSP00000246062
ENSP00000246070
ENSP00000246071
ENSP00000246080
ENSP00000246104
ENSP00000246112
ENSP00000246115
ENSP00000246117
ENSP00000246166
ENSP00000246186
ENSP00000246194
ENSP00000246229
ENSP00000246529
ENSP00000246532
ENSP00000246533
ENSP00000246548
ENSP00000246549
ENSP00000246551
ENSP00000246553
ENSP00000246657
ENSP00000246672
ENSP00000246785
ENSP00000246794
ENSP00000246841
ENSP00000246868
ENSP00000246912
ENSP00000246914
ENSP00000246949
ENSP00000246957
ENSP00000247001
ENSP00000247003
ENSP00000247005
ENSP00000247020
ENSP00000247026
ENSP00000247087
ENSP00000247138
ENSP00000247153
ENSP00000247161
ENSP00000247182
ENSP00000247191
ENSP00000247207
ENSP00000247219
ENSP00000247225
ENSP00000247270
ENSP00000247306
ENSP00000247461
ENSP00000247470
ENSP00000247584
ENSP00000247655
ENSP00000247668
ENSP00000247712
ENSP00000247815
ENSP00000247829
ENSP00000247843
ENSP00000247879
ENSP00000247881
ENSP00000247883
ENSP00000247930
ENSP00000247956
ENSP00000247970
ENSP00000247977
ENSP00000247986
ENSP00000248041
ENSP00000248058
ENSP00000248071
ENSP00000248072
ENSP00000248073
ENSP00000248076
ENSP00000248121
ENSP00000248211
ENSP00000248244
ENSP00000248306
ENSP00000248342
ENSP00000248378
ENSP00000248384
ENSP00000248420
ENSP00000248444
ENSP00000248553
ENSP00000248598
ENSP00000248633
ENSP00000248668
ENSP00000248673
ENSP00000248701
ENSP00000248923
ENSP00000248933
ENSP00000248958
ENSP00000248975
ENSP00000248984
ENSP00000249005
ENSP00000249016
ENSP00000249041
ENSP00000249042
ENSP00000249075
ENSP00000249116
ENSP00000249269
ENSP00000249284
ENSP00000249356
ENSP00000249363
ENSP00000249373
ENSP00000249389
ENSP00000249396
ENSP00000249440
ENSP00000249499
ENSP00000249501
ENSP00000249504
ENSP00000249598
ENSP00000249636
ENSP00000249647
ENSP00000249749
ENSP00000249806
ENSP00000249861
ENSP00000249910
ENSP00000250003
ENSP00000250024
ENSP00000250066
ENSP00000250076
ENSP00000250092
ENSP00000250111
ENSP00000250113
ENSP00000250124
ENSP00000250144
ENSP00000250156
ENSP00000250263
ENSP00000250351
ENSP00000250366
ENSP00000250378
ENSP00000250416
ENSP00000250448
ENSP00000250454
ENSP00000250457
ENSP00000250495
ENSP00000250498
ENSP00000250699
ENSP00000250784
ENSP00000250831
ENSP00000250863
ENSP00000250896
ENSP00000250916
ENSP00000250971
ENSP00000251020
ENSP00000251038
ENSP00000251047
ENSP00000251074
ENSP00000251089
ENSP00000251102
ENSP00000251108
ENSP00000251127
ENSP00000251166
ENSP00000251203
ENSP00000251241
ENSP00000251269
ENSP00000251287
ENSP00000251343
ENSP00000251363
ENSP00000251372
ENSP00000251377
ENSP00000251453
ENSP00000251472
ENSP00000251527
ENSP00000251535
ENSP00000251547
ENSP00000251566
ENSP00000251582
ENSP00000251607
ENSP00000251636
ENSP00000251642
ENSP00000251757
ENSP00000251776
ENSP00000251808
ENSP00000251849
ENSP00000251871
ENSP00000251900
ENSP00000251968
ENSP00000252011
ENSP00000252015
ENSP00000252037
ENSP00000252050
ENSP00000252071
ENSP00000252085
ENSP00000252087
ENSP00000252115
ENSP00000252136
ENSP00000252172
ENSP00000252211
ENSP00000252229
ENSP00000252318
ENSP00000252321
ENSP00000252338
ENSP00000252445
ENSP00000252463
ENSP00000252486
ENSP00000252487
ENSP00000252519
ENSP00000252542
ENSP00000252543
ENSP00000252590
ENSP00000252593
ENSP00000252595
ENSP00000252622
ENSP00000252660
ENSP00000252669
ENSP00000252674
ENSP00000252675
ENSP00000252677
ENSP00000252699
ENSP00000252723
ENSP00000252729
ENSP00000252744
ENSP00000252785
ENSP00000252797
ENSP00000252799
ENSP00000252809
ENSP00000252818
ENSP00000252826
ENSP00000252835
ENSP00000252840
ENSP00000252898
ENSP00000252939
ENSP00000252951
ENSP00000252971
ENSP00000252979
ENSP00000252996
ENSP00000252997
ENSP00000253003
ENSP00000253004
ENSP00000253008
ENSP00000253023
ENSP00000253024
ENSP00000253031
ENSP00000253039
ENSP00000253047
ENSP00000253048
ENSP00000253055
ENSP00000253063
ENSP00000253079
ENSP00000253083
ENSP00000253099
ENSP00000253108
ENSP00000253115
ENSP00000253122
ENSP00000253144
ENSP00000253159
ENSP00000253188
ENSP00000253193
ENSP00000253233
ENSP00000253237
ENSP00000253247
ENSP00000253255
ENSP00000253270
ENSP00000253303
ENSP00000253329
ENSP00000253339
ENSP00000253363
ENSP00000253382
ENSP00000253392
ENSP00000253410
ENSP00000253457
ENSP00000253496
ENSP00000253571
ENSP00000253577
ENSP00000253693
ENSP00000253719
ENSP00000253727
ENSP00000253788
ENSP00000253792
ENSP00000253794
ENSP00000253796
ENSP00000253801
ENSP00000253807
ENSP00000253812
ENSP00000253814
ENSP00000253856
ENSP00000253934
ENSP00000253968
ENSP00000254035
ENSP00000254037
ENSP00000254066
ENSP00000254079
ENSP00000254090
ENSP00000254108
ENSP00000254122
ENSP00000254166
ENSP00000254181
ENSP00000254190
ENSP00000254193
ENSP00000254227
ENSP00000254231
ENSP00000254235
ENSP00000254250
ENSP00000254301
ENSP00000254321
ENSP00000254322
ENSP00000254323
ENSP00000254325
ENSP00000254351
ENSP00000254436
ENSP00000254457
ENSP00000254480
ENSP00000254488
ENSP00000254508
ENSP00000254521
ENSP00000254579
ENSP00000254605
ENSP00000254630
ENSP00000254657
ENSP00000254661
ENSP00000254667
ENSP00000254719
ENSP00000254722
ENSP00000254730
ENSP00000254742
ENSP00000254759
ENSP00000254765
ENSP00000254770
ENSP00000254799
ENSP00000254803
ENSP00000254806
ENSP00000254816
ENSP00000254846
ENSP00000254853
ENSP00000254854
ENSP00000254868
ENSP00000254900
ENSP00000254901
ENSP00000254908
ENSP00000254928
ENSP00000254940
ENSP00000254942
ENSP00000254950
ENSP00000254958
ENSP00000254963
ENSP00000254976
ENSP00000255008
ENSP00000255040
ENSP00000255078
ENSP00000255129
ENSP00000255152
ENSP00000255175
ENSP00000255189
ENSP00000255192
ENSP00000255198
ENSP00000255224
ENSP00000255226
ENSP00000255262
ENSP00000255304
ENSP00000255380
ENSP00000255381
ENSP00000255389
ENSP00000255390
ENSP00000255448
ENSP00000255465
ENSP00000255476
ENSP00000255499
ENSP00000255631
ENSP00000255641
ENSP00000255746
ENSP00000255764
ENSP00000255977
ENSP00000256001
ENSP00000256015
ENSP00000256031
ENSP00000256078
ENSP00000256104
ENSP00000256119
ENSP00000256151
ENSP00000256178
ENSP00000256194
ENSP00000256257
ENSP00000256261
ENSP00000256339
ENSP00000256343
ENSP00000256362
ENSP00000256366
ENSP00000256379
ENSP00000256383
ENSP00000256389
ENSP00000256398
ENSP00000256412
ENSP00000256429
ENSP00000256433
ENSP00000256442
ENSP00000256443
ENSP00000256447
ENSP00000256452
ENSP00000256458
ENSP00000256460
ENSP00000256474
ENSP00000256495
ENSP00000256497
ENSP00000256509
ENSP00000256545
ENSP00000256592
ENSP00000256637
ENSP00000256644
ENSP00000256646
ENSP00000256649
ENSP00000256652
ENSP00000256689
ENSP00000256707
ENSP00000256720
ENSP00000256722
ENSP00000256737
ENSP00000256759
ENSP00000256785
ENSP00000256797
ENSP00000256861
ENSP00000256897
ENSP00000256906
ENSP00000256951
ENSP00000256958
ENSP00000256996
ENSP00000256997
ENSP00000256999
ENSP00000257068
ENSP00000257118
ENSP00000257181
ENSP00000257189
ENSP00000257192
ENSP00000257198
ENSP00000257215
ENSP00000257245
ENSP00000257254
ENSP00000257262
ENSP00000257267
ENSP00000257290
ENSP00000257312
ENSP00000257347
ENSP00000257359
ENSP00000257408
ENSP00000257430
ENSP00000257497
ENSP00000257515
ENSP00000257527
ENSP00000257548
ENSP00000257552
ENSP00000257555
ENSP00000257566
ENSP00000257570
ENSP00000257572
ENSP00000257575
ENSP00000257600
ENSP00000257622
ENSP00000257626
ENSP00000257632
ENSP00000257637
ENSP00000257663
ENSP00000257694
ENSP00000257696
ENSP00000257724
ENSP00000257749
ENSP00000257765
ENSP00000257776
ENSP00000257787
ENSP00000257789
ENSP00000257818
ENSP00000257829
ENSP00000257836
ENSP00000257857
ENSP00000257863
ENSP00000257895
ENSP00000257904
ENSP00000257910
ENSP00000257915
ENSP00000257934
ENSP00000257940
ENSP00000257979
ENSP00000257981
ENSP00000258034
ENSP00000258042
ENSP00000258052
ENSP00000258080
ENSP00000258091
ENSP00000258106
ENSP00000258111
ENSP00000258123
ENSP00000258169
ENSP00000258198
ENSP00000258200
ENSP00000258201
ENSP00000258281
ENSP00000258301
ENSP00000258324
ENSP00000258349
ENSP00000258381
ENSP00000258383
ENSP00000258385
ENSP00000258398
ENSP00000258399
ENSP00000258400
ENSP00000258403
ENSP00000258412
ENSP00000258416
ENSP00000258428
ENSP00000258436
ENSP00000258439
ENSP00000258443
ENSP00000258449
ENSP00000258455
ENSP00000258456
ENSP00000258484
ENSP00000258499
ENSP00000258526
ENSP00000258534
ENSP00000258538
ENSP00000258613
ENSP00000258648
ENSP00000258662
ENSP00000258711
ENSP00000258729
ENSP00000258739
ENSP00000258743
ENSP00000258770
ENSP00000258772
ENSP00000258787
ENSP00000258796
ENSP00000258807
ENSP00000258821
ENSP00000258829
ENSP00000258873
ENSP00000258874
ENSP00000258886
ENSP00000258888
ENSP00000258962
ENSP00000258991
ENSP00000259008
ENSP00000259021
ENSP00000259030
ENSP00000259037
ENSP00000259053
ENSP00000259056
ENSP00000259075
ENSP00000259089
ENSP00000259119
ENSP00000259199
ENSP00000259216
ENSP00000259239
ENSP00000259241
ENSP00000259253
ENSP00000259254
ENSP00000259324
ENSP00000259339
ENSP00000259357
ENSP00000259362
ENSP00000259371
ENSP00000259392
ENSP00000259400
ENSP00000259455
ENSP00000259457
ENSP00000259466
ENSP00000259469
ENSP00000259486
ENSP00000259512
ENSP00000259608
ENSP00000259633
ENSP00000259711
ENSP00000259746
ENSP00000259750
ENSP00000259782
ENSP00000259803
ENSP00000259806
ENSP00000259808
ENSP00000259874
ENSP00000259883
ENSP00000259895
ENSP00000259915
ENSP00000259939
ENSP00000259951
ENSP00000259953
ENSP00000259963
ENSP00000260010
ENSP00000260061
ENSP00000260102
ENSP00000260113
ENSP00000260118
ENSP00000260126
ENSP00000260128
ENSP00000260129
ENSP00000260130
ENSP00000260184
ENSP00000260187
ENSP00000260191
ENSP00000260197
ENSP00000260210
ENSP00000260227
ENSP00000260228
ENSP00000260229
ENSP00000260257
ENSP00000260264
ENSP00000260282
ENSP00000260302
ENSP00000260327
ENSP00000260356
ENSP00000260363
ENSP00000260385
ENSP00000260386
ENSP00000260403
ENSP00000260404
ENSP00000260408
ENSP00000260442
ENSP00000260443
ENSP00000260505
ENSP00000260563
ENSP00000260570
ENSP00000260598
ENSP00000260600
ENSP00000260630
ENSP00000260643
ENSP00000260645
ENSP00000260648
ENSP00000260649
ENSP00000260653
ENSP00000260665
ENSP00000260731
ENSP00000260743
ENSP00000260753
ENSP00000260803
ENSP00000260810
ENSP00000260843
ENSP00000260867
ENSP00000260926
ENSP00000260947
ENSP00000260950
ENSP00000260953
ENSP00000260956
ENSP00000260967
ENSP00000260970
ENSP00000260983
ENSP00000261007
ENSP00000261017
ENSP00000261023
ENSP00000261024
ENSP00000261167
ENSP00000261168
ENSP00000261170
ENSP00000261173
ENSP00000261177
ENSP00000261180
ENSP00000261182
ENSP00000261183
ENSP00000261187
ENSP00000261196
ENSP00000261200
ENSP00000261205
ENSP00000261207
ENSP00000261211
ENSP00000261226
ENSP00000261233
ENSP00000261245
ENSP00000261247
ENSP00000261249
ENSP00000261275
ENSP00000261302
ENSP00000261303
ENSP00000261313
ENSP00000261332
ENSP00000261336
ENSP00000261340
ENSP00000261349
ENSP00000261366
ENSP00000261374
ENSP00000261381
ENSP00000261383
ENSP00000261386
ENSP00000261396
ENSP00000261402
ENSP00000261407
ENSP00000261413
ENSP00000261416
ENSP00000261427
ENSP00000261435
ENSP00000261438
ENSP00000261448
ENSP00000261454
ENSP00000261464
ENSP00000261465
ENSP00000261479
ENSP00000261483
ENSP00000261488
ENSP00000261497
ENSP00000261507
ENSP00000261514
ENSP00000261523
ENSP00000261531
ENSP00000261534
ENSP00000261537
ENSP00000261556
ENSP00000261560
ENSP00000261574
ENSP00000261584
ENSP00000261590
ENSP00000261592
ENSP00000261593
ENSP00000261596
ENSP00000261600
ENSP00000261601
ENSP00000261609
ENSP00000261615
ENSP00000261622
ENSP00000261623
ENSP00000261637
ENSP00000261643
ENSP00000261652
ENSP00000261658
ENSP00000261667
ENSP00000261674
ENSP00000261683
ENSP00000261693
ENSP00000261707
ENSP00000261708
ENSP00000261712
ENSP00000261714
ENSP00000261716
ENSP00000261726
ENSP00000261731
ENSP00000261740
ENSP00000261741
ENSP00000261749
ENSP00000261751
ENSP00000261769
ENSP00000261778
ENSP00000261789
ENSP00000261797
ENSP00000261799
ENSP00000261800
ENSP00000261811
ENSP00000261813
ENSP00000261819
ENSP00000261835
ENSP00000261839
ENSP00000261845
ENSP00000261854
ENSP00000261858
ENSP00000261862
ENSP00000261866
ENSP00000261867
ENSP00000261868
ENSP00000261879
ENSP00000261881
ENSP00000261884
ENSP00000261888
ENSP00000261891
ENSP00000261892
ENSP00000261893
ENSP00000261900
ENSP00000261908
ENSP00000261917
ENSP00000261918
ENSP00000261937
ENSP00000261942
ENSP00000261944
ENSP00000261951
ENSP00000261973
ENSP00000261980
ENSP00000261991
ENSP00000261994
ENSP00000262018
ENSP00000262031
ENSP00000262032
ENSP00000262039
ENSP00000262041
ENSP00000262043
ENSP00000262053
ENSP00000262055
ENSP00000262056
ENSP00000262065
ENSP00000262067
ENSP00000262077
ENSP00000262085
ENSP00000262096
ENSP00000262101
ENSP00000262105
ENSP00000262120
ENSP00000262133
ENSP00000262134
ENSP00000262138
ENSP00000262150
ENSP00000262158
ENSP00000262160
ENSP00000262173
ENSP00000262177
ENSP00000262178
ENSP00000262186
ENSP00000262188
ENSP00000262193
ENSP00000262198
ENSP00000262209
ENSP00000262213
ENSP00000262225
ENSP00000262238
ENSP00000262259
ENSP00000262262
ENSP00000262265
ENSP00000262269
ENSP00000262288
ENSP00000262291
ENSP00000262294
ENSP00000262300
ENSP00000262301
ENSP00000262302
ENSP00000262304
ENSP00000262315
ENSP00000262316
ENSP00000262319
ENSP00000262320
ENSP00000262345
ENSP00000262352
ENSP00000262365
ENSP00000262366
ENSP00000262367
ENSP00000262374
ENSP00000262375
ENSP00000262376
ENSP00000262383
ENSP00000262384
ENSP00000262395
ENSP00000262407
ENSP00000262415
ENSP00000262418
ENSP00000262426
ENSP00000262429
ENSP00000262432
ENSP00000262435
ENSP00000262441
ENSP00000262442
ENSP00000262445
ENSP00000262450
ENSP00000262461
ENSP00000262462
ENSP00000262477
ENSP00000262482
ENSP00000262506
ENSP00000262510
ENSP00000262518
ENSP00000262519
ENSP00000262525
ENSP00000262544
ENSP00000262545
ENSP00000262554
ENSP00000262570
ENSP00000262577
ENSP00000262584
ENSP00000262622
ENSP00000262623
ENSP00000262626
ENSP00000262629
ENSP00000262630
ENSP00000262633
ENSP00000262637
ENSP00000262640
ENSP00000262643
ENSP00000262644
ENSP00000262653
ENSP00000262709
ENSP00000262710
ENSP00000262713
ENSP00000262715
ENSP00000262717
ENSP00000262735
ENSP00000262738
ENSP00000262746
ENSP00000262752
ENSP00000262764
ENSP00000262768
ENSP00000262794
ENSP00000262803
ENSP00000262809
ENSP00000262811
ENSP00000262817
ENSP00000262839
ENSP00000262843
ENSP00000262848
ENSP00000262854
ENSP00000262866
ENSP00000262873
ENSP00000262878
ENSP00000262887
ENSP00000262888
ENSP00000262891
ENSP00000262894
ENSP00000262895
ENSP00000262901
ENSP00000262903
ENSP00000262904
ENSP00000262915
ENSP00000262916
ENSP00000262919
ENSP00000262946
ENSP00000262948
ENSP00000262953
ENSP00000262960
ENSP00000262961
ENSP00000262965
ENSP00000262966
ENSP00000262971
ENSP00000262990
ENSP00000262999
ENSP00000263025
ENSP00000263026
ENSP00000263043
ENSP00000263056
ENSP00000263062
ENSP00000263063
ENSP00000263071
ENSP00000263073
ENSP00000263087
ENSP00000263092
ENSP00000263093
ENSP00000263094
ENSP00000263095
ENSP00000263121
ENSP00000263125
ENSP00000263160
ENSP00000263181
ENSP00000263182
ENSP00000263187
ENSP00000263196
ENSP00000263205
ENSP00000263208
ENSP00000263209
ENSP00000263212
ENSP00000263228
ENSP00000263233
ENSP00000263238
ENSP00000263239
ENSP00000263243
ENSP00000263253
ENSP00000263256
ENSP00000263257
ENSP00000263269
ENSP00000263273
ENSP00000263274
ENSP00000263277
[truncated: 9,419 more rows]
