# Supplementary material for: Identification of COVID-19 Infection-Related Human Genes Based on a Random Walk Model in a Virus–Human Protein Interaction Network
Source: Biomed Res Int. 2020 Jul 8;2020:4256301. doi: 10.1155/2020/4256301 (PMC7345912; doi:10.1155/2020/4256301)
Supplement: Supplementary Materials — Supplementary File 1: the sequences of COVID-19 proteins. Supplementary File 2: the predicted domains and GO functions of COVID-19 proteins by InterProScan. Supplementary File 3: the GO terms with level ≥ 3 of COVID-19 proteins. Supplementary File 4: the candidate human proteins shared the same GO functions of COVID-19. Supplementary File 5: the mapped COVID-19 candidate human proteins on STRING network. Supplementary File 6: the highly confident human proteins associated with infection of COVID-19. [file 4256301.f1.zip › Supp 6.xlsx]

## Sheet: FinalList
Ensembl ID	Probability	pvalue
ENSP00000358674	7.8591e-05	0
ENSP00000367869	7.6549e-05	0
ENSP00000232607	7.5309e-05	0
ENSP00000350052	7.2003e-05	0.01
ENSP00000334044	6.6087e-05	0
ENSP00000310146	6.5479e-05	0
ENSP00000464265	6.5456e-05	0
ENSP00000355865	6.1688e-05	0
ENSP00000340944	5.6666e-05	0.027
ENSP00000377751	5.6531e-05	0.034
ENSP00000297494	5.3263e-05	0.005
ENSP00000381339	5.0984e-05	0
ENSP00000306512	4.7058e-05	0
ENSP00000287641	4.5529e-05	0
ENSP00000293813	4.3637e-05	0.032
ENSP00000353415	4.3331e-05	0
ENSP00000265563	4.2049e-05	0.004
ENSP00000240139	4.1682e-05	0
ENSP00000414303	4.1386e-05	0
ENSP00000281537	4.1382e-05	0.001
ENSP00000334051	4.1208e-05	0
ENSP00000381105	3.9994e-05	0.025
ENSP00000262719	3.8874e-05	0.043
ENSP00000343027	3.8618e-05	0
ENSP00000426909	3.7901e-05	0
ENSP00000296417	3.7596e-05	0.002
ENSP00000308405	3.7184e-05	0.004
ENSP00000468367	3.6965e-05	0
ENSP00000379140	3.6725e-05	0
ENSP00000261405	3.4152e-05	0
ENSP00000262211	3.4132e-05	0
ENSP00000359635	3.39e-05	0
ENSP00000307508	3.3784e-05	0
ENSP00000362481	3.3542e-05	0
ENSP00000262958	3.3088e-05	0.006
ENSP00000340954	3.2823e-05	0
ENSP00000216200	3.2453e-05	0
ENSP00000420295	3.2446e-05	0.016
ENSP00000262493	3.2005e-05	0.013
ENSP00000242152	3.184e-05	0
ENSP00000262608	3.1838e-05	0
ENSP00000317578	3.178e-05	0
ENSP00000360876	3.1747e-05	0
ENSP00000337797	3.1684e-05	0
ENSP00000248572	3.153e-05	0
ENSP00000215956	3.1462e-05	0
ENSP00000259271	3.1317e-05	0.005
ENSP00000357283	3.101e-05	0
ENSP00000470087	3.0799e-05	0
ENSP00000334448	3.057e-05	0.015
ENSP00000379500	2.9992e-05	0.012
ENSP00000377086	2.9761e-05	0
ENSP00000261015	2.9567e-05	0.002
ENSP00000280772	2.9456e-05	0
ENSP00000350928	2.9329e-05	0
ENSP00000386810	2.8658e-05	0
ENSP00000228938	2.835e-05	0.009
ENSP00000232564	2.8127e-05	0.012
ENSP00000348918	2.812e-05	0.005
ENSP00000260402	2.7838e-05	0.006
ENSP00000332194	2.7676e-05	0
ENSP00000327583	2.7602e-05	0
ENSP00000296328	2.758e-05	0.006
ENSP00000340279	2.7047e-05	0.037
ENSP00000251337	2.6684e-05	0.015
ENSP00000304643	2.6669e-05	0
ENSP00000325863	2.6627e-05	0
ENSP00000364298	2.6603e-05	0
ENSP00000302790	2.6387e-05	0
ENSP00000312999	2.6378e-05	0.003
ENSP00000381214	2.6347e-05	0
ENSP00000162023	2.6338e-05	0
ENSP00000370571	2.6325e-05	0.01
ENSP00000332995	2.6119e-05	0
ENSP00000380718	2.6093e-05	0
ENSP00000265709	2.5904e-05	0
ENSP00000330381	2.5812e-05	0
ENSP00000296786	2.5703e-05	0
ENSP00000386444	2.556e-05	0
ENSP00000360502	2.5552e-05	0.029
ENSP00000296870	2.5512e-05	0
ENSP00000360874	2.5427e-05	0
ENSP00000303178	2.5246e-05	0.008
ENSP00000302968	2.5241e-05	0.005
ENSP00000270474	2.5142e-05	0
ENSP00000286719	2.5049e-05	0.007
ENSP00000216267	2.5048e-05	0
ENSP00000250838	2.5045e-05	0.006
ENSP00000372319	2.5023e-05	0.01
ENSP00000289013	2.5016e-05	0
ENSP00000330842	2.4958e-05	0
ENSP00000363939	2.4944e-05	0
ENSP00000349588	2.4901e-05	0
ENSP00000379110	2.4884e-05	0.001
ENSP00000219406	2.4859e-05	0.012
ENSP00000354871	2.4855e-05	0
ENSP00000333018	2.4817e-05	0
ENSP00000016946	2.4695e-05	0
ENSP00000339449	2.4454e-05	0
ENSP00000468280	2.4352e-05	0
ENSP00000308610	2.4337e-05	0
ENSP00000347046	2.4178e-05	0.001
ENSP00000330343	2.4146e-05	0
ENSP00000254260	2.4123e-05	0
ENSP00000392262	2.4119e-05	0
ENSP00000221403	2.4013e-05	0
ENSP00000386588	2.3978e-05	0
ENSP00000261254	2.3932e-05	0
ENSP00000293879	2.3923e-05	0
ENSP00000403936	2.3821e-05	0.004
ENSP00000299564	2.3764e-05	0.007
ENSP00000357597	2.3718e-05	0.001
ENSP00000436786	2.3664e-05	0
ENSP00000406407	2.3648e-05	0
ENSP00000295113	2.3624e-05	0
ENSP00000348944	2.3621e-05	0
ENSP00000319474	2.3537e-05	0
ENSP00000367197	2.3465e-05	0
ENSP00000251810	2.3428e-05	0
ENSP00000362386	2.3409e-05	0
ENSP00000403304	2.3383e-05	0
ENSP00000415634	2.3305e-05	0
ENSP00000303452	2.3257e-05	0
ENSP00000350267	2.3243e-05	0
ENSP00000313571	2.3237e-05	0
ENSP00000360689	2.3224e-05	0
ENSP00000306637	2.3189e-05	0
ENSP00000355657	2.3168e-05	0.005
ENSP00000438284	2.3079e-05	0
ENSP00000381253	2.3019e-05	0
ENSP00000335612	2.2945e-05	0
ENSP00000308815	2.2918e-05	0.016
ENSP00000262017	2.2902e-05	0.003
ENSP00000288861	2.2889e-05	0
ENSP00000265077	2.2888e-05	0.008
ENSP00000380982	2.2801e-05	0
ENSP00000334105	2.2777e-05	0.002
ENSP00000225512	2.2757e-05	0
ENSP00000285814	2.2675e-05	0
ENSP00000259607	2.2652e-05	0
ENSP00000279230	2.264e-05	0.004
ENSP00000324960	2.25e-05	0.014
ENSP00000313572	2.2485e-05	0
ENSP00000360690	2.2476e-05	0
ENSP00000435591	2.2471e-05	0.045
ENSP00000326267	2.2423e-05	0
ENSP00000357219	2.2403e-05	0
ENSP00000369689	2.2401e-05	0
ENSP00000377051	2.2346e-05	0
ENSP00000321106	2.2295e-05	0.001
ENSP00000362677	2.2253e-05	0
ENSP00000347689	2.2188e-05	0
ENSP00000341032	2.2149e-05	0
ENSP00000222270	2.2128e-05	0.008
ENSP00000262027	2.2112e-05	0
ENSP00000451131	2.1936e-05	0
ENSP00000302100	2.1884e-05	0
ENSP00000231572	2.1883e-05	0.034
ENSP00000382004	2.1833e-05	0.016
ENSP00000410943	2.1776e-05	0
ENSP00000452401	2.175e-05	0
ENSP00000311837	2.1745e-05	0
ENSP00000347498	2.1717e-05	0
ENSP00000288976	2.1698e-05	0
ENSP00000358698	2.1678e-05	0
ENSP00000291539	2.1627e-05	0.028
ENSP00000232975	2.1625e-05	0.02
ENSP00000286063	2.1619e-05	0
ENSP00000350275	2.1555e-05	0.002
ENSP00000364389	2.1488e-05	0
ENSP00000348129	2.1466e-05	0
ENSP00000366814	2.1448e-05	0
ENSP00000317310	2.1407e-05	0
ENSP00000431165	2.1372e-05	0
ENSP00000298283	2.1252e-05	0
ENSP00000301037	2.1234e-05	0
ENSP00000329418	2.1209e-05	0.001
ENSP00000380692	2.1167e-05	0
ENSP00000415183	2.1155e-05	0.016
ENSP00000337103	2.1025e-05	0.042
ENSP00000239223	2.084e-05	0.004
ENSP00000453089	2.083e-05	0
ENSP00000224764	2.0814e-05	0
ENSP00000390158	2.0785e-05	0
ENSP00000450040	2.0765e-05	0
ENSP00000294312	2.0731e-05	0.007
ENSP00000357087	2.0689e-05	0
ENSP00000276414	2.0687e-05	0.014
ENSP00000356430	2.0615e-05	0
ENSP00000293255	2.0415e-05	0
ENSP00000230640	2.0303e-05	0
ENSP00000053468	2.0294e-05	0
ENSP00000369042	2.0269e-05	0
ENSP00000230859	2.0266e-05	0.046
ENSP00000438262	2.0206e-05	0.005
ENSP00000397181	2.0189e-05	0.017
ENSP00000385632	2.0154e-05	0
ENSP00000347744	2.0027e-05	0
ENSP00000356429	2.0008e-05	0
ENSP00000267953	2.0003e-05	0
ENSP00000451320	2.0002e-05	0
ENSP00000257627	1.9945e-05	0
ENSP00000364361	1.9937e-05	0.043
ENSP00000333194	1.9926e-05	0
ENSP00000369579	1.9892e-05	0
ENSP00000251630	1.9849e-05	0
ENSP00000219611	1.9844e-05	0
ENSP00000276571	1.9789e-05	0.02
ENSP00000309595	1.9774e-05	0
ENSP00000329558	1.9754e-05	0.013
ENSP00000419005	1.9739e-05	0.008
ENSP00000256857	1.9715e-05	0
ENSP00000363779	1.9698e-05	0.004
ENSP00000362616	1.9642e-05	0
ENSP00000320488	1.9597e-05	0.031
ENSP00000346037	1.9541e-05	0
ENSP00000300145	1.9509e-05	0
ENSP00000173229	1.9472e-05	0.012
ENSP00000348596	1.9376e-05	0.002
ENSP00000332225	1.9345e-05	0.001
ENSP00000264039	1.9322e-05	0.002
ENSP00000264218	1.9272e-05	0
ENSP00000229328	1.9225e-05	0
ENSP00000294288	1.9202e-05	0.003
ENSP00000265131	1.9196e-05	0.014
ENSP00000308887	1.9187e-05	0
ENSP00000355480	1.9166e-05	0
ENSP00000314077	1.9133e-05	0
ENSP00000345344	1.9117e-05	0.027
ENSP00000446743	1.9115e-05	0
ENSP00000370410	1.9111e-05	0.047
ENSP00000355583	1.9103e-05	0
ENSP00000256010	1.8987e-05	0
ENSP00000242104	1.8926e-05	0
ENSP00000328023	1.8831e-05	0
ENSP00000362171	1.8751e-05	0
ENSP00000346402	1.875e-05	0.028
ENSP00000407436	1.873e-05	0.001
ENSP00000337746	1.8727e-05	0
ENSP00000301645	1.8706e-05	0.008
ENSP00000366629	1.8568e-05	0
ENSP00000370473	1.8531e-05	0.001
ENSP00000352252	1.85e-05	0.042
ENSP00000340691	1.8493e-05	0
ENSP00000266058	1.8472e-05	0.001
ENSP00000357255	1.8414e-05	0.024
ENSP00000369335	1.8381e-05	0.001
ENSP00000217305	1.8368e-05	0.002
ENSP00000305702	1.8327e-05	0
ENSP00000365806	1.8226e-05	0.007
ENSP00000354525	1.8048e-05	0.004
ENSP00000403932	1.8044e-05	0.002
ENSP00000310189	1.8028e-05	0.001
ENSP00000346598	1.8016e-05	0
ENSP00000322419	1.801e-05	0
ENSP00000262613	1.7993e-05	0.001
ENSP00000351671	1.7974e-05	0.001
ENSP00000256079	1.792e-05	0
ENSP00000409267	1.791e-05	0
ENSP00000468991	1.789e-05	0
ENSP00000264345	1.7811e-05	0.038
ENSP00000396995	1.7781e-05	0.004
ENSP00000321656	1.7754e-05	0
ENSP00000221561	1.7739e-05	0
ENSP00000334122	1.7674e-05	0.002
ENSP00000316482	1.764e-05	0.019
ENSP00000360644	1.7571e-05	0
ENSP00000323313	1.7482e-05	0.002
ENSP00000281741	1.741e-05	0.012
ENSP00000380523	1.7393e-05	0
ENSP00000262483	1.739e-05	0
ENSP00000327179	1.736e-05	0.026
ENSP00000371169	1.735e-05	0
ENSP00000322724	1.7311e-05	0
ENSP00000292377	1.7277e-05	0
ENSP00000325448	1.7249e-05	0.003
ENSP00000307567	1.7237e-05	0.004
ENSP00000262144	1.7199e-05	0.018
ENSP00000429276	1.7184e-05	0
ENSP00000384880	1.7159e-05	0
ENSP00000367631	1.7149e-05	0.01
ENSP00000366061	1.7142e-05	0
ENSP00000398163	1.7135e-05	0
ENSP00000274867	1.7108e-05	0.003
ENSP00000377385	1.7098e-05	0
ENSP00000222462	1.7093e-05	0
ENSP00000369897	1.7086e-05	0.009
ENSP00000327984	1.7062e-05	0
ENSP00000402825	1.7053e-05	0
ENSP00000364486	1.7051e-05	0.039
ENSP00000328327	1.7027e-05	0
ENSP00000380514	1.7001e-05	0.002
ENSP00000360329	1.6814e-05	0.028
ENSP00000220616	1.6687e-05	0.044
ENSP00000379364	1.667e-05	0
ENSP00000332111	1.6635e-05	0
ENSP00000226444	1.6604e-05	0.024
ENSP00000354901	1.6528e-05	0.001
ENSP00000324248	1.6472e-05	0.008
ENSP00000348772	1.6461e-05	0
ENSP00000356213	1.6456e-05	0
ENSP00000353796	1.6448e-05	0
ENSP00000362617	1.6302e-05	0
ENSP00000359525	1.6261e-05	0.005
ENSP00000235382	1.6212e-05	0.029
ENSP00000428209	1.6202e-05	0
ENSP00000409346	1.6189e-05	0.01
ENSP00000273077	1.6146e-05	0
ENSP00000296028	1.6127e-05	0.015
ENSP00000252575	1.6113e-05	0.001
ENSP00000357206	1.6056e-05	0
ENSP00000293275	1.6054e-05	0.008
ENSP00000329697	1.5998e-05	0.049
ENSP00000290015	1.5997e-05	0
ENSP00000450730	1.5965e-05	0
ENSP00000247170	1.5963e-05	0.036
ENSP00000268802	1.5898e-05	0
ENSP00000322218	1.5867e-05	0
ENSP00000379138	1.583e-05	0.002
ENSP00000396774	1.5782e-05	0.011
ENSP00000221167	1.5771e-05	0.004
ENSP00000240652	1.5758e-05	0.002
ENSP00000366246	1.5754e-05	0
ENSP00000309181	1.5748e-05	0
ENSP00000427279	1.5736e-05	0.004
ENSP00000428619	1.5596e-05	0
ENSP00000389465	1.558e-05	0
ENSP00000359864	1.5524e-05	0
ENSP00000316809	1.5496e-05	0
ENSP00000355785	1.5474e-05	0
ENSP00000381247	1.5449e-05	0
ENSP00000386959	1.5398e-05	0.001
ENSP00000262662	1.5352e-05	0
ENSP00000278856	1.5339e-05	0.011
ENSP00000265245	1.5227e-05	0.001
ENSP00000325660	1.5218e-05	0.012
ENSP00000340677	1.5181e-05	0
ENSP00000428340	1.518e-05	0
ENSP00000254101	1.5128e-05	0
ENSP00000246802	1.5078e-05	0.001
ENSP00000306884	1.503e-05	0.001
ENSP00000216780	1.4976e-05	0.043
ENSP00000297469	1.4902e-05	0
ENSP00000180166	1.4872e-05	0
ENSP00000335618	1.4776e-05	0
ENSP00000296027	1.4764e-05	0
ENSP00000406861	1.4745e-05	0.042
ENSP00000304822	1.4682e-05	0
ENSP00000396747	1.4565e-05	0
ENSP00000386502	1.4492e-05	0
ENSP00000358747	1.446e-05	0.026
ENSP00000445688	1.4422e-05	0
ENSP00000319501	1.4405e-05	0.034
ENSP00000337128	1.4376e-05	0.012
ENSP00000471417	1.4373e-05	0
ENSP00000358202	1.4329e-05	0
ENSP00000346012	1.4317e-05	0.021
ENSP00000267017	1.4221e-05	0
ENSP00000295470	1.4181e-05	0.001
ENSP00000275525	1.4176e-05	0.026
ENSP00000334738	1.4131e-05	0
ENSP00000295930	1.4122e-05	0
ENSP00000257868	1.4088e-05	0
ENSP00000250405	1.4045e-05	0
ENSP00000413479	1.4029e-05	0
ENSP00000300648	1.4021e-05	0.008
ENSP00000328694	1.3978e-05	0
ENSP00000362105	1.397e-05	0.006
ENSP00000355370	1.3915e-05	0.045
ENSP00000248566	1.3831e-05	0.011
ENSP00000259050	1.3802e-05	0
ENSP00000374353	1.38e-05	0
ENSP00000272928	1.3781e-05	0
ENSP00000233468	1.3761e-05	0
ENSP00000011619	1.3736e-05	0.023
ENSP00000379213	1.3733e-05	0
ENSP00000304903	1.3712e-05	0.006
ENSP00000244766	1.3661e-05	0
ENSP00000424417	1.3609e-05	0
ENSP00000352414	1.3582e-05	0
ENSP00000365016	1.3552e-05	0.018
ENSP00000358099	1.3538e-05	0
ENSP00000339804	1.3367e-05	0
ENSP00000350467	1.3349e-05	0
ENSP00000353198	1.3317e-05	0.018
ENSP00000261368	1.3302e-05	0.038
ENSP00000245960	1.3258e-05	0.02
ENSP00000361668	1.3243e-05	0.023
ENSP00000345767	1.3141e-05	0.002
ENSP00000408005	1.3112e-05	0.041
ENSP00000224950	1.3059e-05	0.002
ENSP00000413493	1.3002e-05	0
ENSP00000397239	1.2979e-05	0
ENSP00000364037	1.29e-05	0.012
ENSP00000269601	1.2877e-05	0
ENSP00000328251	1.2841e-05	0.005
ENSP00000258742	1.2833e-05	0.04
ENSP00000226317	1.2828e-05	0.019
ENSP00000382269	1.2794e-05	0.014
ENSP00000259631	1.2767e-05	0.017
ENSP00000325663	1.276e-05	0.001
ENSP00000263851	1.2747e-05	0.003
ENSP00000330101	1.2734e-05	0
ENSP00000320566	1.271e-05	0.034
ENSP00000331210	1.2633e-05	0.001
ENSP00000346046	1.261e-05	0
ENSP00000297350	1.2607e-05	0.004
ENSP00000308107	1.2474e-05	0.015
ENSP00000421799	1.2464e-05	0
ENSP00000314897	1.2441e-05	0.003
ENSP00000311697	1.243e-05	0.008
ENSP00000290575	1.2402e-05	0
ENSP00000296026	1.2368e-05	0.001
ENSP00000467958	1.2331e-05	0
ENSP00000373918	1.2307e-05	0
ENSP00000215555	1.2229e-05	0.01
ENSP00000357025	1.2219e-05	0
ENSP00000374309	1.2201e-05	0.014
ENSP00000340736	1.2152e-05	0.003
ENSP00000350005	1.2076e-05	0.004
ENSP00000046794	1.2065e-05	0.018
ENSP00000259206	1.2017e-05	0.003
ENSP00000264025	1.1997e-05	0.022
ENSP00000355899	1.1984e-05	0.001
ENSP00000274625	1.1983e-05	0.006
ENSP00000312262	1.1943e-05	0
ENSP00000378089	1.1943e-05	0.045
ENSP00000420477	1.1862e-05	0.003
ENSP00000379086	1.1858e-05	0.022
ENSP00000356793	1.1818e-05	0.001
ENSP00000301280	1.181e-05	0.01
ENSP00000262968	1.1809e-05	0
ENSP00000357051	1.1735e-05	0.003
ENSP00000264554	1.1713e-05	0.014
ENSP00000231228	1.169e-05	0
ENSP00000397297	1.1607e-05	0.041
ENSP00000420227	1.151e-05	0
ENSP00000280614	1.1498e-05	0.024
ENSP00000324532	1.1492e-05	0.017
ENSP00000454445	1.1468e-05	0
ENSP00000339428	1.1363e-05	0
ENSP00000413074	1.135e-05	0.012
ENSP00000311364	1.1315e-05	0.001
ENSP00000274140	1.1296e-05	0
ENSP00000454786	1.1295e-05	0
ENSP00000332766	1.1141e-05	0.006
ENSP00000354416	1.1117e-05	0
ENSP00000296277	1.1082e-05	0
ENSP00000395253	1.106e-05	0
ENSP00000464034	1.1057e-05	0.001
ENSP00000280665	1.1033e-05	0.002
ENSP00000392995	1.1023e-05	0
ENSP00000314343	1.0995e-05	0.004
ENSP00000462730	1.0988e-05	0
ENSP00000280193	1.0954e-05	0.001
ENSP00000310785	1.0947e-05	0.007
ENSP00000263985	1.0884e-05	0.039
ENSP00000364293	1.088e-05	0.004
ENSP00000263665	1.0863e-05	0.049
ENSP00000434258	1.0848e-05	0.006
ENSP00000014930	1.0799e-05	0
ENSP00000340526	1.0787e-05	0
ENSP00000296102	1.0772e-05	0.004
ENSP00000451040	1.0772e-05	0.026
ENSP00000324450	1.0758e-05	0
ENSP00000295619	1.0748e-05	0.001
ENSP00000347314	1.0704e-05	0.01
ENSP00000265388	1.067e-05	0.007
ENSP00000298687	1.0658e-05	0.044
ENSP00000267085	1.0594e-05	0.049
ENSP00000243786	1.0551e-05	0.032
ENSP00000361642	1.0483e-05	0.017
ENSP00000307197	1.0404e-05	0.006
ENSP00000329384	1.035e-05	0.016
ENSP00000204615	1.0305e-05	0
ENSP00000296545	1.0288e-05	0
ENSP00000245983	1.0283e-05	0.001
ENSP00000263697	1.0215e-05	0
ENSP00000217173	1.0205e-05	0.008
ENSP00000386655	1.0196e-05	0
ENSP00000295228	1.0189e-05	0.019
ENSP00000264497	1.0176e-05	0
ENSP00000445077	1.0137e-05	0.023
ENSP00000054668	1.0131e-05	0.009
ENSP00000354952	1.0043e-05	0.002
ENSP00000339613	1.0016e-05	0.004
